# Supplementary material for: Immune Gene Expression Is Associated with Genomic Aberrations in Breast Cancer
Source: Oxford University Press journal article supplement (doi:10.1158/0008-5472.can-16-3478), 2017-04-20
Supplement: 00085472can163478-sup-176412_2_unknown_upload_3970256_ff3ztl.xlsx [file 00085472can163478-sup-176412_2_unknown_upload_3970256_ff3ztl.xlsx]

## Sheet: Sheet1
HLA-DRB1
HLA-DRA
HLA-A
B2M
CD74
KLK3
TAP2
TAP1
GCNT2
KLKB1
TCN2
VIPR1
SEC14L2
TAF8
SEC14L3
IL10RA
IL10RB
JAK1
IL10
BLVRA
MAP3K5
IL1A
TNF
IL6
MAP2K6
HMOX1
MAPK14
C2
IL12RB2
IL12RB1
IFNG
STAT4
TYK2
JAK2
NOS2
PIK3R1
PIK3CA
NMI
CREBBP
EP300
IL7R
ITGA2B
IL2RG
JAK3
BCL2
PTK2B
LCK
FYN
EIF4E
IL7
MYO1C
PIK3CB
PIK3CD
PIK3CG
OPN1LW
STAT5A
STAT5B
PAG1
PCBP4
TFDP1
E2F1
IL2
IL2RB
IL2RA
RB1
GRB2
SOS1
SHC1
RAF1
PPIA
FASLG
FAS
FOS
MYC
PCNA
RPS6KB1
MAPK3
MAPK1
BCL2L1
MAP2K2
MAP2K1
PDPK1
HRAS
AKT1
SOCS3
SOCS1
PTPN6
BAD
CRKL
CBL
IRS1
FASN
IKZF3
MTG1
JUN
ETV5
MAPK8
CCR5
IL18R1
IL4R
IL4
STAT6
IGHE
FCER2
HMGA1
SLC25A6
IL22
IL22RA2
IL22RA1
IL17D
RELA
MAP3K7
IL1RAP
MYD88
IL1R1
TOLLIP
CHUK
IKBKB
IKBKG
NFKBIA
IL1B
MAP4K4
IL1RN
IFNB1
IFNA1
TRAF6
MAP3K1
MAP2K3
TAB1
TAB2
DOCK3
FOSB
JUNB
JUND
PEBP1
PKD1
MED1
PPBP
NR2C2
ARHGEF7
ECSIT
SYK
IL6R
LRPPRC
PTPN11
CEBPB
STAT3
IL6ST
NM
IL3RA
CSF2RB
IL3
CSK
BCAR1
PXN
PTK2
SRC
ACTA1
BDKRB2
CAV1
NOS3
HIF1A
ARNT
PLCG1
VHL
KRIT1
DAG1
HSP90AA1
HSP90AA2
VEGFA
PXDN
DYT10
PRRT2
NANOS3
MIA3
RHOA
CDC42
CSF1R
ANGPTL3
CD47
TGFBR2
RAC1
IGF1
PAK1
PIK3C2A
VAV3
FGF2
RHO
ILK
ADRA1D
CDKN1B
CSE1L
CTNND1
FGF13
KDR
PI4KA
PKN1
THOC1
EDIL3
SIRPA
IL5RA
IL5
LYN
CISH
PIM1
LONP1
GNAI2
GNB1
GNG2
IL8
CXCR1
DNM1
GNA15
GNA14
PDK1
PLD1
ADRBK1
PRKCSH
RAB5A
GAB2
TERT
MTOR
SMS
MYB
CAMP
FOXO3
GCLC
SMPD1
UGCG
EIF3A
RAI1
H19
CHAMP1
SOCS2
STAT1
MAPKAPK2
CDK2
PPP2R4
PRB3
RASA1
CXCR2
RAB11A
VASP
ELMO1
DOCK2
PPP2CA
PPP2R1A
RAC2
PLD2
TFAP2A
RAB7A
RAB7B
IL12B
IL12A
IL27RA
EBI3
IL27
STAT2
IL18
TGFB1
GATA3
IL17A
C19orf10
IRAK4
IL1R2
TICAM2
GTF2H1
IRAK1
MAP3K3
UBE2N
UBE2V1
IRAK3
ERC1
DCTN4
YWHAZ
HDAC1
YWHAG
SRP9
OSM
ID1
INPP5D
KSR1
CNKSR1
CCM2
IL23R
IL23A
IL19
IL24
IL17F
CXCL1
CD4
CXCL9
CD3E
CCL2
ALOX12B
NANOS2
IRS2
FES
IL13RA1
PARP14
IRF4
BCL6
ETS1
OPRM1
IL13RA2
ARG1
ALOX15
SP1
SOCS5
COL1A1
TFF3
PIGR
COL1A2
CCL11
CCL26
EGR2
THY1
IGHG3
GTF3A
IGHG4
SPI1
CCL17
CD40LG
LTA
PSG1
SELP
NR0B2
AICDA
TINAGL1
RETNLB
DAND5
CD3G
CD3D
RELB
SPHK2
CD8B
CD8A
EOMES
ATF2
GADD45B
GADD45G
CD247
GDNF
HLX
CCL3
CCL4
RIPK2
ARHGEF28
TARP
HCK
LMO4
FOXO1
PIAS3
MITF
PIAS1
HSP90B1
CEBPD
TIMP1
LBP
CRP
FGG
MCL1
VAV1
A2M
IRF1
CSRP1
EHHADH
FOSL2
RPSA
MAP2K4
CSRP3
FOSL1
TNFSF11
RNASEH2A
PPIAP10
FOXP3
ELF1
CDK6
ELOF1
CD28
IL13
CD58
CD2
CD34
TRB@
KITLG
TRA@
CSF3
CSNK2A1
ELK1
CCR3
SRF
BLVRB
CXCR3
CFLAR
TGFB2
MAP3K14
IRAK2
TGFB3
NFKB1
GAB1
CD2AP
NRP1
NCK1
NRP2
DECR1
FLT1
NELL1
NELL2
PGF
IGKV1D-39
PIGU
FRS2
ROCK1
IQGAP1
SHB
GRB10
NEDD4
VEGFB
S1PR1
EPAS1
FLT4
HSPB1
HSPB2
SH2D2A
MAP3K13
SHC2
CRK
CREB1
FIGF
PRKCB
EIF1
PRKCA
EIF2B4
ELAVL1
EIF2B2
EIF2B3
EIF2S2
EIF2B5
EIF2B1
EIF2S3
EIF2S1
EIF1AX
SMAD4
SMAD3
HDAC7
CITED2
ENO1
NDRG1
GCK
PKM
PGM1
LDHA
PGK1
ALDOA
ID2
PFKL
FURIN
FECH
ABCG2
ENG
HK2
EPO
TF
HK1
ADM
PFKFB3
CP
GATA2
2017-12-01
CXCL12
CXCR4
IGFBP1
BNIP3
NPM1
PLIN2
CA9
EDN1
F3
HNF4A
KCNA4
KCNA5
KIF2A
NT5E
SERPINE1
SERPINB2
ABCB1
MAP4K2
SLC2A1
SLC2A3
TFRC
EPX
BHLHE40
HDAC9
NCOA2
COPS5
TBC1D9
HOOK2
HOOK1
EGLN1
BHLHE41
EGLN3
TAC4
OS9
TCEB1
TCEB2
CUL2
RBX1
TRIM23
CASR
CDKN2A
PPP1R8
TP53
NAA10
GNB2L1
HIF3A
SIRT1
ADORA2A
TWIST1
FXN
APEX1
DMRT1
EIF3E
MMP14
SLC11A2
POU5F1
TEAD1
TFPI2
KCNH4
CHMP2B
INTS6
KCNH8
P4HB
ASPH
MAX
CEBPA
MAP4K3
MAP4K5
MAP4K1
RPS6KA1
MAP2K7
MAP3K11
MAP3K4
MAP3K12
PAK2
MAPK9
MAPK10
MAPK7
MAP2K5
MAP3K2
MAP3K8
MAPK11
MAPK13
ARAF
PKN2
MAPK12
AIMP2
GRAP2
HMGN1
MAPKAPK5
PLA2G1B
MKNK1
DDIT3
RPS6KA5
MAP3K9
GNAS
GNGT1
ARRB1
FZD4
LPAR3
LGR6
MRGPRX3
MRGPRX4
GPR151
OXER1
GPRC6A
MRGPRX1
VN1R17P
GPR166P
NGFR
PTPRR
PPP2R5D
MKNK2
NGF
DSP
DSPP
RARA
RXRA
EGF
EGFR
ZBTB16
NCOR2
RAB40B
CDK5R1
CDK5
EGR1
FCN2
GCHFR
UPK3B
GNAQ
RIT1
TRPV1
EHD4
MEF2C
BRAF
RAP1A
RIT2
RUSC1
TERF2IP
BCL11B
TSC2
TCF3
MAPKAPK3
CDC25B
LSP1
TH
ALOX5
ETV1
PRRC2A
KIAA1549L
TCF7L1
CRYGEP
TRAF2
ATM
GADD45A
IRF6
MAP3K10
TXN
MAP3K6
TANK
VAC14
MEF2D
MEF2BNB-MEF2B
MEF2A
RIPK1
RAPGEF2
RPS6KA2
RPS6KA3
DAXX
RPS6KB2
MAPK4
RPS6KA4
MAPK6
TGFBR1
TRADD
PLA2G4A
PLCB1
ADCY1
PECAM1
CTNNB1
VCL
CTNNA1
PDGFRB
CLDN1
VAV2
PTPRM
PIP5K1C
RAPGEF1
FARP2
PVRL3
ZYX
TNS1
ITGB1
CAPN1
ITGA1
TLN1
LRPAP1
NOLC1
MLC1
BCR
PPP1R12B
ALPP
ATHS
SLPI
CCL27
MMRN1
ATRNL1
PDLIM3
NAT10
ASRGL1
AXIN1
LRP6
FZD5
WNT3A
SKP1
CUL1
APC
AXIN2
DVL1
PROC
DVL1P1
PITX2
TNIK
TCF4
MYF5
HBP1
DVL3
KLF4
BCL9
TLE2
LEF1
CDX1
AR
TLE4
TRRAP
TLE1
MED12
AES
KCNIP4
ZCCHC12
SALL4
CDX4
CACNA1G
COX2
CYR61
DKK1
DKK4
SP5
FGF4
AKR1B1
AREG
VCAN
PTGS2
SNAI2
SMARCA4
TBL1X
HNF1A
TCF7L2
IGF2BP1
RUVBL2
CTNNBIP1
TBL1XR1
TBL1Y
KREMEN2
DKK2
WNT1
FZD1
TIRAP
TLR4
CD14
LY96
EIF2AK2
BTRC
FRAT1
GSK3B
GJA1
CCND1
WIF1
CSNK2A2
NDUFA2
PKLR
TIAM1
ARF6
NME1
AP1M1
SRA1
ABI1
DLG1
NAP1L1
RMRP
SOX9
TJP1
NAPSA
ACTR2
WASF2
CHERP
NCKAP1
CYFIP1
ANGPTL2
KLHL20
C9orf156
ENAH
SCAF1
AZI2
NAA25
TAB3
FGFR4
FGF1
FGF9
FGF16
FGF6
FGF8
FGF19
FGF17
FGF18
FGF23
FGF3
FGF10
FGF5
IGF2
RET
ADAM10
HGS
MEP1B
RIN2
SNX1
MMP7
NTF4
NTRK1
NTRK2
NTRK3
PTPN1
CBLL1
CABLES1
AJUBA
PIP5K1A
MET
HGF
GIT1
EPHA2
MYL2
LPP
KIF3C
DIAPH1
MGAT3
PLEKHA7
RNMT
EXOC3
LIMA1
CAMSAP3
EXOC4
MOGAT3
LRP5
GAP43
FER
KIF5B
FGFR1
CAMK2G
GRIA2
GRM2
COX7A2L
MAPRE2
MAPRE1
ANKS1B
IFNGR1
IFNAR2
IFNAR1
ST13
HMGB1
ACTB
SMARCB1
SMARCE1
SMARCC2
SMARCC1
SMARCD1
ARID1A
GTF2F1
GTF2A1
GTF2B
NR3C1
POLR2A
GTF2E1
TBP
KAT2B
TRIM63
POTEF
CHP1
CABIN1
RCAN1
FKBP1A
FKBP1AP1
FKBP1AP2
FKBP1AP3
FKBP1AP4
AKAP5
RCAN2
CHORDC1
LAT
FLNA
ITK
BCL10
CARD11
MALT1
PTEN
ORAI1
STIM1
RASGRP1
CRAT
FYB
LCP2
PTPRC
SH3BP2
WAS
ZAP70
RASGRP2
ORC3
STK39
DBNL
CROT
TRPV6
RASSF5
SPNS1
SLA2
CD40
C4BPA
TRAF3
TRAF1
BIRC3
TNFAIP3
IGKV1-27
TDP2
PTPN7
PTPRA
IKBKAP
DUSP1
EGR4
TNFRSF9
NFATC2
TNFRSF4
TNFRSF18
