# Supplementary material for: Immune Gene Expression Is Associated with Genomic Aberrations in Breast Cancer
Source: Oxford University Press journal article supplement (doi:10.1158/0008-5472.can-16-3478), 2017-04-20
Supplement: 00085472can163478-sup-176412_2_unknown_upload_3970257_rr3ztm.xlsx [file 00085472can163478-sup-176412_2_unknown_upload_3970257_rr3ztm.xlsx]

## Sheet: SupplTable S1
	TCGA.ID	X	TCGA.Barcode	Unique.Order	Age	Stage	ER	PR	HER2	type	LCK metageneexpression
1	A03L	1	TCGA-AO-A03L	342	34	Stage IIIA	Positive	Positive	Positive	ER+/HER2+	3.73404
2	A03O	2	TCGA-AO-A03O	345	69	Stage IIA	Positive	Positive	Negative	ER+/HER2-	5.04596
3	A03P	3	TCGA-AO-A03P	346	54	Stage IIB	Positive	Positive	Negative	ER+/HER2-	2.38567
4	A03R	4	TCGA-AO-A03R	347	57	Stage IIB	Positive	Positive	Negative	ER+/HER2-	4.03178
5	A03T	5	TCGA-AO-A03T	348	42	Stage IIB	Positive	Positive	Negative	ER+/HER2-	3.47133
6	A03V	6	TCGA-AO-A03V	350	41	Stage I	Positive	Positive	Negative	ER+/HER2-	2.99612
7	A03X	7	TCGA-AN-A03X	303	74	Stage IIA	Positive	Positive	Positive	ER+/HER2+	2.47354
8	A03Y	8	TCGA-AN-A03Y	304	66	Stage IIA	Positive	Positive	Negative	ER+/HER2-	3.06171
9	A041	9	TCGA-AN-A041	305	29	Stage IIB	Positive	Negative	Positive	ER+/HER2+	2.50858
10	A046	10	TCGA-AN-A046	306	68	Stage IIA	Positive	Positive	Negative	ER+/HER2-	5.09314
11	A049	11	TCGA-AN-A049	307	62	Stage IIA	Positive	Positive	Negative	ER+/HER2-	3.47405
12	A04A	12	TCGA-AN-A04A	308	36	Stage IIIA	Positive	Positive	Negative	ER+/HER2-	2.18337
13	A04C	13	TCGA-AN-A04C	309	51	Stage IIB	Negative	Negative	Positive	ER-/HER2+	2.84519
14	A04D	14	TCGA-AN-A04D	310	58	Stage IIB	Negative	Negative	Negative	ER-/HER2-	2.08931
15	A04J	15	TCGA-AQ-A04J	390	45	Stage IIA	Negative	Negative	Negative	ER-/HER2-	5.33974
16	A04N	16	TCGA-A2-A04N	23	66	Stage IA	Positive	Positive	Negative	ER+/HER2-	2.82243
17	A04P	17	TCGA-A2-A04P	24	36	Stage IIIC	Negative	Negative	Negative	ER-/HER2-	3.65115
18	A04Q	18	TCGA-A2-A04Q	25	48	Stage IA	Negative	Negative	Negative	ER-/HER2-	6.68562
19	A04R	19	TCGA-A2-A04R	26	36	Stage IA	Positive	Positive	Negative	ER+/HER2-	1.09848
20	A04T	20	TCGA-A2-A04T	27	62	Stage IIA	Negative	Negative	Negative	ER-/HER2-	5.22152
21	A04U	21	TCGA-A2-A04U	28	47	Stage IIA	Negative	Negative	Negative	ER-/HER2-	1.31647
22	A04V	22	TCGA-A2-A04V	29	39	Stage IIA	Positive	Positive	Negative	ER+/HER2-	2.39162
23	A04W	23	TCGA-A2-A04W	30	50	Stage IIB	Negative	Negative	Positive	ER-/HER2+	2.42745
24	A04X	24	TCGA-A2-A04X	31	34	Stage IIA	Positive	Positive	Positive	ER+/HER2+	5.42965
25	A04Y	25	TCGA-A2-A04Y	32	53	Stage IIB	Positive	Positive	Negative	ER+/HER2-	3.44679
26	A06N	26	TCGA-A8-A06N	175	66	Stage IIIB	Positive	Negative	Negative	ER+/HER2-	2.44521
27	A06O	27	TCGA-A8-A06O	176	60	Stage I	Positive	Positive	Negative	ER+/HER2-	3.14634
28	A06P	28	TCGA-A8-A06P	177	63	Stage IIIA	Positive	Positive	Negative	ER+/HER2-	2.48773
29	A06Q	29	TCGA-A8-A06Q	178	63	Stage IIIA	Positive	Positive	Negative	ER+/HER2-	1.56527
30	A06R	30	TCGA-A8-A06R	179	69	Stage IIB	Positive	Negative	Positive	ER+/HER2+	4.06588
31	A06T	31	TCGA-A8-A06T	180	75	Stage IIIA	Positive	Positive	Positive	ER+/HER2+	4.31995
32	A06U	32	TCGA-A8-A06U	181	80	Stage IIB	Positive	Positive	Positive	ER+/HER2+	4.45817
33	A06X	33	TCGA-A8-A06X	182	77	Stage IIB	Positive	Negative	Positive	ER+/HER2+	4.42297
34	A06Y	34	TCGA-A8-A06Y	183	66	Stage IIA	Positive	Positive	Negative	ER+/HER2-	1.69742
35	A06Z	35	TCGA-A8-A06Z	184	84	Stage IIB	Positive	Positive	Negative	ER+/HER2-	1.24036
36	A075	36	TCGA-A8-A075	185	42	Stage IIB	Positive	Positive	Positive	ER+/HER2+	4.80547
37	A076	37	TCGA-A8-A076	186	66	Stage IIA	Positive	Positive	Positive	ER+/HER2+	3.42276
38	A079	38	TCGA-A8-A079	187	69	Stage IIIB	Positive	Positive	Negative	ER+/HER2-	2.22653
39	A07B	39	TCGA-A8-A07B	188	69	Stage IIA	Positive	Positive	Positive	ER+/HER2+	2.82158
40	A07C	40	TCGA-A8-A07C	189	57	Stage IIA	Negative	Negative	Negative	ER-/HER2-	4.94993
41	A07E	41	TCGA-A8-A07E	190	81	Stage X	Positive	Positive	Negative	ER+/HER2-	3.8079
42	A07F	42	TCGA-A8-A07F	191	65	Stage IIB	Positive	Positive	Negative	ER+/HER2-	3.61787
43	A07G	43	TCGA-A8-A07G	192	65	Stage IIA	Positive	Positive	Negative	ER+/HER2-	3.95371
44	A07I	44	TCGA-A8-A07I	193	69	Stage IIIA	Positive	Negative	Positive	ER+/HER2+	4.27505
45	A07J	45	TCGA-A8-A07J	194	35	Stage IIB	Positive	Positive	Negative	ER+/HER2-	3.80967
46	A07L	46	TCGA-A8-A07L	195	58	Stage IIIA	Positive	Positive	Negative	ER+/HER2-	3.23383
47	A07O	47	TCGA-A8-A07O	196	51	Stage IIA	Negative	Negative	Negative	ER-/HER2-	3.80039
48	A07P	48	TCGA-A8-A07P	197	68	Stage IIB	Positive	Positive	Positive	ER+/HER2+	2.54254
49	A07R	49	TCGA-A8-A07R	198	80	Stage IIIC	Negative	Negative	Positive	ER-/HER2+	2.4378
50	A07S	50	TCGA-A8-A07S	199	73	Stage IIA	Positive	Negative	Negative	ER+/HER2-	2.23256
51	A07U	51	TCGA-A8-A07U	200	66	Stage IIIA	Negative	Positive	Negative	ER-/HER2-	6.46948
52	A07W	52	TCGA-A8-A07W	201	76	Stage IV	Positive	Positive	Negative	ER+/HER2-	3.56342
53	A07Z	53	TCGA-A8-A07Z	202	85	Stage IIA	Positive	Positive	Negative	ER+/HER2-	3.31734
54	A081	54	TCGA-A8-A081	203	80	Stage IIA	Positive	Positive	Negative	ER+/HER2-	5.44532
55	A082	55	TCGA-A8-A082	204	58	Stage IIB	Positive	Positive	Negative	ER+/HER2-	1.06912
56	A083	56	TCGA-A8-A083	205	67	Stage IIB	Positive	Positive	Negative	ER+/HER2-	3.68977
57	A084	57	TCGA-A8-A084	206	81	Stage IIB	Positive	Negative	Negative	ER+/HER2-	2.64006
58	A085	58	TCGA-A8-A085	207	44	Stage IIB	Positive	Positive	Negative	ER+/HER2-	-3.38904
59	A086	59	TCGA-A8-A086	208	59	Stage IIA	Positive	Positive	Negative	ER+/HER2-	1.11727
60	A08A	60	TCGA-A8-A08A	209	89	Stage I	Positive	Positive	Negative	ER+/HER2-	3.70428
61	A08B	61	TCGA-A8-A08B	210	52	Stage IIA	Positive	Negative	Positive	ER+/HER2+	4.33766
62	A08C	62	TCGA-A8-A08C	211	65	Stage IIA	Positive	Positive	Positive	ER+/HER2+	2.70906
63	A08F	63	TCGA-A8-A08F	212	59	Stage IIIC	Positive	Positive	Negative	ER+/HER2-	5.05004
64	A08G	64	TCGA-A8-A08G	213	41	Stage IIA	Positive	Positive	Positive	ER+/HER2+	3.63822
65	A08H	65	TCGA-A8-A08H	214	66	Stage IIA	Positive	Positive	Positive	ER+/HER2+	4.7942
66	A08I	66	TCGA-A8-A08I	215	53	Stage IIA	Positive	Positive	Negative	ER+/HER2-	6.56673
67	A08J	67	TCGA-A8-A08J	216	52	Stage IV	Positive	Negative	Negative	ER+/HER2-	3.00258
68	A08L	68	TCGA-A8-A08L	217	89	Stage IIIA	Positive	Negative	Negative	ER+/HER2-	4.85515
69	A08O	69	TCGA-A8-A08O	218	45	Stage IV	Positive	Positive	Negative	ER+/HER2-	2.54375
70	A08P	70	TCGA-A8-A08P	219	70	Stage IIIA	Positive	Positive	Positive	ER+/HER2+	5.10745
71	A08R	71	TCGA-A8-A08R	220	52	Stage IIB	Negative	Negative	Negative	ER-/HER2-	5.43242
72	A08S	72	TCGA-A8-A08S	221	71	Stage IIA	Positive	Positive	Positive	ER+/HER2+	4.61755
73	A08T	73	TCGA-A8-A08T	222	64	Stage IV	Positive	Positive	Positive	ER+/HER2+	3.02726
74	A08X	74	TCGA-A8-A08X	223	43	Stage IIIC	Negative	Negative	Positive	ER-/HER2+	4.02899
75	A08Z	75	TCGA-A8-A08Z	224	76	Stage IIIB	Positive	Positive	Negative	ER+/HER2-	3.24033
76	A090	76	TCGA-A8-A090	225	74	Stage IIA	Positive	Positive	Positive	ER+/HER2+	4.00645
77	A091	77	TCGA-A8-A091	226	61	Stage IIA	Positive	Negative	Negative	ER+/HER2-	2.73468
78	A092	78	TCGA-A8-A092	227	48	Stage IIIA	Positive	Positive	Negative	ER+/HER2-	2.95192
79	A093	79	TCGA-A8-A093	228	61	Stage IIA	Positive	Positive	Negative	ER+/HER2-	1.44807
80	A094	80	TCGA-A8-A094	229	75	Stage IIA	Positive	Negative	Negative	ER+/HER2-	5.3409
81	A095	81	TCGA-A8-A095	230	45	Stage I	Positive	Positive	Negative	ER+/HER2-	3.6888
82	A096	82	TCGA-A8-A096	231	73	Stage IIA	Positive	Positive	Negative	ER+/HER2-	4.88093
83	A097	83	TCGA-A8-A097	232	65	Stage IIB	Positive	Positive	Positive	ER+/HER2+	3.72805
84	A099	84	TCGA-A8-A099	233	76	Stage X	Positive	Positive	Positive	ER+/HER2+	2.43665
85	A09A	85	TCGA-A8-A09A	234	40	Stage X	Positive	Positive	Negative	ER+/HER2-	3.86285
86	A09B	86	TCGA-A8-A09B	235	58	Stage IIIB	Positive	Positive	Negative	ER+/HER2-	2.30542
87	A09C	87	TCGA-A8-A09C	236	69	Stage X	Positive	Positive	Negative	ER+/HER2-	1.7254
88	A09D	88	TCGA-A8-A09D	237	47	Stage IIB	Positive	Positive	Negative	ER+/HER2-	3.04798
89	A09E	89	TCGA-A8-A09E	238	73	Stage IIIB	Positive	Positive	Positive	ER+/HER2+	2.0215
90	A09G	90	TCGA-A8-A09G	239	79	Stage IIIC	Positive	Negative	Positive	ER+/HER2+	5.1936
91	A09I	91	TCGA-A8-A09I	240	84	Stage IIA	Positive	Positive	Positive	ER+/HER2+	5.16492
92	A09K	92	TCGA-A8-A09K	241	68	Stage IIA	Positive	Positive	Negative	ER+/HER2-	4.77484
93	A09M	93	TCGA-A8-A09M	242	75	Stage IIIC	Positive	Positive	Negative	ER+/HER2-	4.61745
94	A09N	94	TCGA-A8-A09N	243	57	Stage IIIC	Positive	Positive	Positive	ER+/HER2+	3.65142
95	A09Q	95	TCGA-A8-A09Q	244	83	Stage IIIB	Positive	Positive	Negative	ER+/HER2-	5.51149
96	A09R	96	TCGA-A8-A09R	245	82	Stage IIB	Positive	Positive	Negative	ER+/HER2-	4.97582
97	A09T	97	TCGA-A8-A09T	246	68	Stage X	Positive	Positive	Negative	ER+/HER2-	2.10573
98	A09V	98	TCGA-A8-A09V	247	51	Stage IIA	Positive	Positive	Negative	ER+/HER2-	1.77505
99	A09W	99	TCGA-A8-A09W	248	70	Stage IIIB	Positive	Positive	Negative	ER+/HER2-	3.84248
100	A09X	100	TCGA-A8-A09X	249	62	Stage IIIC	Negative	Negative	Negative	ER-/HER2-	4.77958
101	A09Z	101	TCGA-A8-A09Z	250	83	Stage IIB	Positive	Negative	Negative	ER+/HER2-	5.47293
102	A0A1	102	TCGA-A8-A0A1	251	84	Stage IIA	Positive	Positive	Negative	ER+/HER2-	4.98168
103	A0A2	103	TCGA-A8-A0A2	252	66	Stage IIA	Positive	Positive	Negative	ER+/HER2-	3.61053
104	A0A4	104	TCGA-A8-A0A4	253	73	Stage IIA	Positive	Positive	Negative	ER+/HER2-	3.16063
105	A0A6	105	TCGA-A8-A0A6	254	64	Stage IIIC	Positive	Positive	Negative	ER+/HER2-	5.27056
106	A0A7	106	TCGA-A8-A0A7	255	57	Stage IIB	Negative	Negative	Positive	ER-/HER2+	6.34378
107	A0A9	107	TCGA-A8-A0A9	256	80	Stage IIA	Positive	Positive	Negative	ER+/HER2-	2.96111
108	A0AB	108	TCGA-A8-A0AB	257	54	Stage IIA	Positive	Positive	Positive	ER+/HER2+	0.398289
109	A0AD	109	TCGA-A8-A0AD	258	83	Stage I	Positive	Positive	Negative	ER+/HER2-	2.08498
110	A0AJ	110	TCGA-AN-A0AJ	311	79	Stage IIB	Positive	Positive	Positive	ER+/HER2+	5.27293
111	A0AK	111	TCGA-AN-A0AK	312	76	Stage IIA	Positive	Negative	Positive	ER+/HER2+	3.73743
112	A0AL	112	TCGA-AN-A0AL	313	41	Stage IIIB	Negative	Negative	Negative	ER-/HER2-	5.09112
113	A0AM	113	TCGA-AN-A0AM	314	56	Stage IIA	Positive	Negative	Negative	ER+/HER2-	4.57608
114	A0AR	114	TCGA-AN-A0AR	315	55	Stage IIA	Negative	Negative	Negative	ER-/HER2-	0.915771
115	A0AS	115	TCGA-AN-A0AS	316	70	Stage IIIA	Positive	Negative	Negative	ER+/HER2-	2.59488
116	A0AT	116	TCGA-AN-A0AT	317	62	Stage IIA	Negative	Negative	Negative	ER-/HER2-	4.54996
117	A0AU	117	TCGA-BH-A0AU	524	45	Stage IIA	Positive	Positive	Positive	ER+/HER2+	4.13874
118	A0AV	118	TCGA-BH-A0AV	525	52	Stage I	Negative	Negative	Negative	ER-/HER2-	3.02471
119	A0AW	119	TCGA-BH-A0AW	526	56	Stage IIA	Positive	Negative	Positive	ER+/HER2+	5.47337
120	A0AY	120	TCGA-BH-A0AY	527	62	Stage IIA	Positive	Positive	Negative	ER+/HER2-	3.47492
121	A0AZ	121	TCGA-BH-A0AZ	529	47	Stage IIIA	Positive	Positive	Negative	ER+/HER2-	3.0302
122	A0B0	122	TCGA-BH-A0B0	531	56	Stage I	Positive	Positive	Negative	ER+/HER2-	5.06756
123	A0B1	123	TCGA-BH-A0B1	532	66	Stage IIB	Positive	Positive	Negative	ER+/HER2-	4.14445
124	A0B2	124	TCGA-BH-A0B2	533	43	Stage I	Positive	Positive	Negative	ER+/HER2-	6.11439
125	A0B3	125	TCGA-BH-A0B3	535	53	Stage IIB	Negative	Negative	Negative	ER-/HER2-	5.06865
126	A0B4	126	TCGA-BH-A0B4	536	65	Stage IIIA	Positive	Positive	Equivocal	Unclassified	3.42541
127	A0B5	127	TCGA-BH-A0B5	537	40	Stage IIIA	Positive	Positive	Negative	ER+/HER2-	4.00185
128	A0B6	128	TCGA-BH-A0B6	539	47	Stage I	Positive	Positive	Positive	ER+/HER2+	6.68192
129	A0B7	129	TCGA-BH-A0B7	541	42	Stage IIB	Positive	Positive	Positive	ER+/HER2+	5.0572
130	A0B8	130	TCGA-BH-A0B8	542	64	Stage I	Positive	Positive	Negative	ER+/HER2-	2.27925
131	A0B9	131	TCGA-BH-A0B9	544	44	Stage IA	Negative	Negative	Negative	ER-/HER2-	5.18958
132	A0BA	132	TCGA-BH-A0BA	546	51	Stage IIIC	Positive	Positive	Negative	ER+/HER2-	3.87342
133	A0BC	133	TCGA-BH-A0BC	548	60	Stage IIIC	Positive	Positive	Negative	ER+/HER2-	4.08802
134	A0BD	134	TCGA-BH-A0BD	549	47	Stage IIA	Positive	Positive	Negative	ER+/HER2-	4.40362
135	A0BF	135	TCGA-BH-A0BF	550	56	Stage IIB	Positive	Positive	Negative	ER+/HER2-	5.96241
136	A0BG	136	TCGA-BH-A0BG	551	73	Stage I	Negative	Negative	Negative	ER-/HER2-	5.70405
137	A0BJ	137	TCGA-BH-A0BJ	553	41	Stage IIB	Positive	Positive	Negative	ER+/HER2-	3.3829
138	A0BL	138	TCGA-BH-A0BL	554	35	Stage I	Negative	Negative	Negative	ER-/HER2-	5.79526
139	A0BM	139	TCGA-BH-A0BM	556	54	Stage IIB	Positive	Negative	Negative	ER+/HER2-	3.13077
140	A0BO	140	TCGA-BH-A0BO	557	54	Stage I	Positive	Positive	Negative	ER+/HER2-	4.41749
141	A0BP	141	TCGA-BH-A0BP	558	76	Stage I	Positive	Positive	Negative	ER+/HER2-	3.22708
142	A0BQ	142	TCGA-BH-A0BQ	560	39	Stage I	Positive	Positive	Positive	ER+/HER2+	4.17849
143	A0BR	143	TCGA-BH-A0BR	561	59	Stage I	Positive	Positive	Negative	ER+/HER2-	4.16242
144	A0BS	144	TCGA-BH-A0BS	563	55	Stage IIIA	Positive	Positive	Negative	ER+/HER2-	1.68734
145	A0BT	145	TCGA-BH-A0BT	564	56	Stage IIA	Positive	Positive	Negative	ER+/HER2-	4.1135
146	A0BV	146	TCGA-BH-A0BV	566	78	Stage IIB	Positive	Positive	Negative	ER+/HER2-	3.25694
147	A0BW	147	TCGA-BH-A0BW	568	71	Stage I	Negative	Negative	Negative	ER-/HER2-	6.63612
148	A0BZ	148	TCGA-BH-A0BZ	570	59	Stage IIIA	Positive	Positive	Negative	ER+/HER2-	5.58867
149	A0C0	149	TCGA-BH-A0C0	572	62	Stage IIA	Positive	Positive	Negative	ER+/HER2-	6.39853
150	A0C3	150	TCGA-BH-A0C3	575	47	Stage I	Positive	Negative	Negative	ER+/HER2-	4.33021
151	A0CD	151	TCGA-A7-A0CD	125	66	Stage I	Positive	Positive	Equivocal	Unclassified	2.0739
152	A0CE	152	TCGA-A7-A0CE	126	57	Stage IIA	Negative	Negative	Negative	ER-/HER2-	3.89424
153	A0CG	153	TCGA-A7-A0CG	128	78	Stage IIA	Positive	Negative	Negative	ER+/HER2-	4.61023
154	A0CH	154	TCGA-A7-A0CH	129	79	Stage IIA	Positive	[Not Evaluated]	Negative	ER+/HER2-	2.5547
155	A0CJ	155	TCGA-A7-A0CJ	131	57	Stage IIA	Positive	Positive	Negative	ER+/HER2-	3.19747
156	A0CK	156	TCGA-A2-A0CK	33	60	Stage IIIA	Positive	Positive	Negative	ER+/HER2-	3.10639
157	A0CL	157	TCGA-A2-A0CL	34	37	Stage IIIA	Positive	Positive	Negative	ER+/HER2-	6.78393
158	A0CM	158	TCGA-A2-A0CM	35	40	Stage IIA	Negative	Negative	Negative	ER-/HER2-	5.90561
159	A0CO	159	TCGA-A2-A0CO	36	85	Stage IIB	Positive	Positive	Negative	ER+/HER2-	5.48946
160	A0CP	160	TCGA-A2-A0CP	37	60	Stage IA	Positive	Positive	Negative	ER+/HER2-	2.84265
161	A0CQ	161	TCGA-A2-A0CQ	38	62	Stage IA	Positive	Positive	Negative	ER+/HER2-	1.55402
162	A0CR	162	TCGA-A2-A0CR	39	54	Stage IIB	Positive	Positive	Negative	ER+/HER2-	5.5787
163	A0CS	163	TCGA-A2-A0CS	40	73	Stage IV	Positive	Positive	Negative	ER+/HER2-	2.67956
164	A0CT	164	TCGA-A2-A0CT	41	71	Stage IIA	Positive	Negative	Equivocal	Unclassified	2.90159
165	A0CU	165	TCGA-A2-A0CU	42	73	Stage IIA	Positive	Positive	Equivocal	Unclassified	2.66168
166	A0CV	166	TCGA-A2-A0CV	43	41	Stage IIB	Positive	Positive	Negative	ER+/HER2-	4.34696
167	A0CW	167	TCGA-A2-A0CW	44	67	Stage IIB	Positive	Positive	Negative	ER+/HER2-	4.23863
168	A0CX	168	TCGA-A2-A0CX	45	52	Stage IIA	Positive	Negative	Positive	ER+/HER2+	4.01735
169	A0CY	169	TCGA-A2-A0CY	46	63	Stage IIB	Positive	Positive	Negative	ER+/HER2-	0.886396
170	A0CZ	170	TCGA-A2-A0CZ	47	46	Stage IIA	Positive	Positive	Negative	ER+/HER2-	3.74758
171	A0D0	171	TCGA-A2-A0D0	48	60	Stage IIA	Negative	Negative	Negative	ER-/HER2-	4.83691
172	A0D1	172	TCGA-A2-A0D1	49	76	Stage IIA	Negative	Negative	Positive	ER-/HER2+	1.75833
173	A0D2	173	TCGA-A2-A0D2	50	45	Stage IIA	Negative	Negative	Negative	ER-/HER2-	5.05795
174	A0D3	174	TCGA-A2-A0D3	51	42	Stage IA	Positive	Positive	Negative	ER+/HER2-	4.56565
175	A0D4	175	TCGA-A2-A0D4	52	37	Stage IIB	Positive	Positive	Negative	ER+/HER2-	2.28753
176	A0D9	176	TCGA-A7-A0D9	133	37	Stage IIA	Positive	Negative	Negative	ER+/HER2-	1.88774
177	A0DA	177	TCGA-A7-A0DA	134	62	Stage IIA	Negative	Negative	Negative	ER-/HER2-	2.30191
178	A0DB	178	TCGA-A7-A0DB	135	56	Stage IIA	Positive	Positive	Negative	ER+/HER2-	2.18842
179	A0DC	179	TCGA-A7-A0DC	138	63	Stage IA	Positive	Negative	Negative	ER+/HER2-	-3.3797
180	A0DD	180	TCGA-BH-A0DD	579	58	Stage IIB	Positive	Positive	Positive	ER+/HER2+	3.81522
181	A0DE	181	TCGA-BH-A0DE	580	62	Stage IIA	Positive	Positive	Negative	ER+/HER2-	3.60814
182	A0DG	182	TCGA-BH-A0DG	581	30	Stage IIA	Positive	Negative	Negative	ER+/HER2-	4.32308
183	A0DH	183	TCGA-BH-A0DH	583	63	Stage IIB	Positive	Positive	Negative	ER+/HER2-	2.48543
184	A0DI	184	TCGA-BH-A0DI	585	63	Stage IIB	Positive	Positive	Negative	ER+/HER2-	4.15939
185	A0DK	185	TCGA-BH-A0DK	587	49	Stage IIA	Positive	Positive	Negative	ER+/HER2-	5.05339
186	A0DL	186	TCGA-BH-A0DL	588	64	Stage IIA	Positive	Negative	Negative	ER+/HER2-	5.5084
187	A0DP	187	TCGA-BH-A0DP	592	60	Stage IIB	Positive	Positive	Negative	ER+/HER2-	4.00214
188	A0DQ	188	TCGA-BH-A0DQ	595	42	Stage IIB	Positive	Positive	Negative	ER+/HER2-	3.02307
189	A0DS	189	TCGA-BH-A0DS	596	71	Stage IIIA	Positive	Positive	Negative	ER+/HER2-	3.6617
190	A0DT	190	TCGA-BH-A0DT	598	41	Stage IIA	Positive	Positive	Negative	ER+/HER2-	4.31052
191	A0DV	191	TCGA-BH-A0DV	599	54	Stage IIIA	Positive	Positive	Negative	ER+/HER2-	3.58227
192	A0DX	192	TCGA-BH-A0DX	601	62	Stage I	Positive	Positive	Negative	ER+/HER2-	3.49245
193	A0DZ	193	TCGA-BH-A0DZ	602	43	Stage IIB	Positive	Positive	Positive	ER+/HER2+	3.79176
194	A0E0	194	TCGA-BH-A0E0	605	38	Stage IIIC	Negative	Negative	Negative	ER-/HER2-	2.23567
195	A0E1	195	TCGA-BH-A0E1	606	52	Stage IIB	Positive	Positive	Negative	ER+/HER2-	2.40919
196	A0E2	196	TCGA-BH-A0E2	608	49	Stage IIIA	Positive	Positive	Negative	ER+/HER2-	3.88834
197	A0E6	197	TCGA-BH-A0E6	609	69	Stage IA	Negative	Negative	Negative	ER-/HER2-	4.04148
198	A0E7	198	TCGA-BH-A0E7	610	79	Stage IIB	Positive	Positive	Negative	ER+/HER2-	1.13454
199	A0EA	199	TCGA-BH-A0EA	612	72	Stage IIA	Positive	Positive	Negative	ER+/HER2-	3.52821
200	A0EB	200	TCGA-BH-A0EB	613	69	Stage IA	Positive	Positive	Negative	ER+/HER2-	4.10921
201	A0EE	201	TCGA-BH-A0EE	614	68	Stage IIB	Negative	Negative	Positive	ER-/HER2+	4.30609
202	A0EI	202	TCGA-BH-A0EI	615	51	Stage IIA	Positive	Positive	Negative	ER+/HER2-	2.10871
203	A0EM	203	TCGA-A2-A0EM	53	73	Stage IA	Positive	Positive	Negative	ER+/HER2-	2.1944
204	A0EN	204	TCGA-A2-A0EN	54	70	Stage IIA	Positive	Positive	Negative	ER+/HER2-	5.11976
205	A0EO	205	TCGA-A2-A0EO	55	54	Stage IA	Positive	Positive	Negative	ER+/HER2-	3.88633
206	A0EP	206	TCGA-A2-A0EP	56	56	Stage I	Positive	Negative	Negative	ER+/HER2-	5.96204
207	A0EQ	207	TCGA-A2-A0EQ	57	64	Stage IIA	Negative	Negative	Positive	ER-/HER2+	6.45298
208	A0ER	208	TCGA-A2-A0ER	58	63	Stage IB	Positive	Positive	Negative	ER+/HER2-	2.36832
209	A0ES	209	TCGA-A2-A0ES	59	52	Stage IIA	Positive	Positive	Negative	ER+/HER2-	3.905
210	A0ET	210	TCGA-A2-A0ET	60	58	Stage IIIA	Positive	Positive	Negative	ER+/HER2-	3.88153
211	A0EU	211	TCGA-A2-A0EU	61	79	Stage IA	Positive	Positive	Negative	ER+/HER2-	2.95343
212	A0EV	212	TCGA-A2-A0EV	62	80	Stage IA	Positive	Positive	Negative	ER+/HER2-	4.06188
213	A0EW	213	TCGA-A2-A0EW	63	53	Stage IIIC	Positive	Positive	Negative	ER+/HER2-	4.76455
214	A0EX	214	TCGA-A2-A0EX	64	46	Stage IIB	Positive	Positive	Negative	ER+/HER2-	4.68973
215	A0EY	215	TCGA-A2-A0EY	65	62	Stage IIB	Positive	Negative	Positive	ER+/HER2+	3.83582
216	A0FD	216	TCGA-AN-A0FD	318	71	Stage IIA	Positive	Positive	Positive	ER+/HER2+	4.0897
217	A0FF	217	TCGA-AN-A0FF	319	32	Stage IA	Positive	Positive	Negative	ER+/HER2-	3.82459
218	A0FJ	218	TCGA-AN-A0FJ	320	59	Stage IV	Positive	Negative	Positive	ER+/HER2+	2.6818
219	A0FK	219	TCGA-AN-A0FK	321	88	Stage IIIB	Positive	Positive	Positive	ER+/HER2+	2.16913
220	A0FL	220	TCGA-AN-A0FL	322	62	Stage IIA	Negative	Negative	Positive	ER-/HER2+	1.50388
221	A0FN	221	TCGA-AN-A0FN	323	61	Stage IB	Positive	Positive	Positive	ER+/HER2+	5.12183
222	A0FS	222	TCGA-AN-A0FS	324	55	Stage IB	Positive	Negative	Positive	ER+/HER2+	2.63526
223	A0FT	223	TCGA-AN-A0FT	325	63	Stage IIB	Positive	Positive	Positive	ER+/HER2+	2.04748
224	A0FV	224	TCGA-AN-A0FV	326	58	Stage IIA	Negative	Negative	Positive	ER-/HER2+	2.1461
225	A0FW	225	TCGA-AN-A0FW	327	67	Stage IIIA	Positive	Indeterminate	Negative	ER+/HER2-	3.05189
226	A0FX	226	TCGA-AN-A0FX	328	52	Stage IIA	Negative	Negative	Positive	ER-/HER2+	2.93188
227	A0FY	227	TCGA-AN-A0FY	329	55	Stage IB	Positive	Positive	Negative	ER+/HER2-	2.67731
228	A0FZ	228	TCGA-AN-A0FZ	330	45	Stage IIIA	Positive	Negative	Positive	ER+/HER2+	2.48527
229	A0G0	229	TCGA-AN-A0G0	331	56	Stage IIA	Negative	Negative	Negative	ER-/HER2-	3.6807
230	A0GY	230	TCGA-BH-A0GY	616	67	Stage IIA	Positive	Positive	Negative	ER+/HER2-	4.21205
231	A0GZ	231	TCGA-BH-A0GZ	617	62	Stage IIA	Positive	Positive	Negative	ER+/HER2-	1.80347
232	A0H0	232	TCGA-BH-A0H0	618	69	Stage IA	Positive	Positive	Negative	ER+/HER2-	2.492
233	A0H3	233	TCGA-BH-A0H3	619	46	Stage I	Positive	Positive	Negative	ER+/HER2-	3.34939
234	A0H5	234	TCGA-BH-A0H5	621	45	Stage I	Positive	Positive	Negative	ER+/HER2-	7.13875
235	A0H6	235	TCGA-BH-A0H6	622	82	Stage I	Positive	Positive	Negative	ER+/HER2-	2.08479
236	A0H7	236	TCGA-BH-A0H7	623	65	Stage IIIA	Positive	Positive	Negative	ER+/HER2-	3.06039
237	A0H9	237	TCGA-BH-A0H9	626	69	Stage IIA	Positive	Positive	Negative	ER+/HER2-	2.55352
238	A0HA	238	TCGA-BH-A0HA	627	31	Stage I	Positive	Positive	Negative	ER+/HER2-	4.36107
239	A0HB	239	TCGA-BH-A0HB	629	55	Stage IA	Positive	Positive	Negative	ER+/HER2-	4.22467
240	A0HF	240	TCGA-BH-A0HF	630	77	Stage IA	Positive	Positive	Negative	ER+/HER2-	3.81721
241	A0HI	241	TCGA-BH-A0HI	631	78	Stage IA	Positive	Positive	Negative	ER+/HER2-	2.97925
242	A0HK	242	TCGA-BH-A0HK	632	81	Stage IIB	Positive	Negative	Negative	ER+/HER2-	2.88168
243	A0HL	243	TCGA-BH-A0HL	634	56	Stage IIB	Positive	Positive	Negative	ER+/HER2-	-3.50845
244	A0HN	244	TCGA-BH-A0HN	635	67	Stage IA	Positive	Positive	Negative	ER+/HER2-	0.532705
245	A0HO	245	TCGA-BH-A0HO	636	48	Stage IIA	Positive	Positive	Negative	ER+/HER2-	4.26008
246	A0HP	246	TCGA-BH-A0HP	637	65	Stage IIIA	Positive	Negative	Negative	ER+/HER2-	3.31157
247	A0HQ	247	TCGA-BH-A0HQ	638	56	Stage IIA	Positive	Positive	Negative	ER+/HER2-	2.51238
248	A0HU	248	TCGA-BH-A0HU	639	52	Stage IA	Positive	Positive	Negative	ER+/HER2-	2.70651
249	A0HW	249	TCGA-BH-A0HW	640	62	Stage IA	Positive	Negative	Positive	ER+/HER2+	0.430939
250	A0HX	250	TCGA-BH-A0HX	641	54	Stage IIB	Positive	Positive	Negative	ER+/HER2-	3.08784
251	A0HY	251	TCGA-BH-A0HY	642	60	Stage I	Positive	Negative	Positive	ER+/HER2+	2.3208
252	A0I1	252	TCGA-B6-A0I1	467	73	Stage IIA	Negative	Negative	Negative	ER-/HER2-	0.97144
253	A0I2	253	TCGA-B6-A0I2	468	45	Stage IA	Negative	[Not Evaluated]	Negative	ER-/HER2-	6.07653
254	A0I5	254	TCGA-B6-A0I5	469	49	Stage IIB	Positive	Positive	Negative	ER+/HER2-	4.00065
255	A0I6	255	TCGA-B6-A0I6	470	49	Stage IIA	Negative	Negative	Negative	ER-/HER2-	1.98038
256	A0I8	256	TCGA-B6-A0I8	471	46	Stage X	Positive	[Not Evaluated]	Positive	ER+/HER2+	1.54503
257	A0I9	257	TCGA-B6-A0I9	472	62	Stage IV	Positive	Positive	Positive	ER+/HER2+	3.58188
258	A0IA	258	TCGA-B6-A0IA	473	51	Stage IIA	Positive	Positive	Negative	ER+/HER2-	2.07265
259	A0IB	259	TCGA-B6-A0IB	474	64	Stage IV	Positive	Positive	Negative	ER+/HER2-	0.928392
260	A0IC	260	TCGA-B6-A0IC	475	90	Stage X	Positive	Positive	Negative	ER+/HER2-	0.55792
261	A0IE	261	TCGA-B6-A0IE	476	38	Stage Tis	Negative	Negative	Negative	ER-/HER2-	1.38301
262	A0IG	262	TCGA-B6-A0IG	477	50	Stage IIB	Positive	Positive	Positive	ER+/HER2+	3.09379
263	A0IH	263	TCGA-B6-A0IH	478	81	Stage IIIA	Positive	Positive	Negative	ER+/HER2-	4.53716
264	A0IJ	264	TCGA-B6-A0IJ	479	42	Stage IIB	Positive	Positive	Negative	ER+/HER2-	5.33755
265	A0IK	265	TCGA-B6-A0IK	480	63	Stage IIIB	Negative	Negative	Negative	ER-/HER2-	3.59919
266	A0IM	266	TCGA-B6-A0IM	481	75	Stage IIB	Positive	Positive	Negative	ER+/HER2-	2.39713
267	A0IN	267	TCGA-B6-A0IN	482	45	Stage X	Positive	Negative	Negative	ER+/HER2-	3.88422
268	A0IO	268	TCGA-B6-A0IO	483	66	Stage IIA	Positive	Indeterminate	Negative	ER+/HER2-	3.00218
269	A0IP	269	TCGA-B6-A0IP	484	74	Stage IA	Positive	Positive	Negative	ER+/HER2-	3.97903
270	A0IQ	270	TCGA-B6-A0IQ	485	40	Stage IIIA	Negative	Negative	Negative	ER-/HER2-	4.05135
271	A0J2	271	TCGA-AO-A0J2	351	41	Stage IA	Negative	Negative	Negative	ER-/HER2-	5.54606
272	A0J3	272	TCGA-AO-A0J3	352	67	Stage IIB	Positive	Positive	Negative	ER+/HER2-	2.19673
273	A0J4	273	TCGA-AO-A0J4	353	41	Stage IA	Negative	Negative	Negative	ER-/HER2-	5.32071
274	A0J5	274	TCGA-AO-A0J5	354	48	Stage IV	Positive	Negative	Negative	ER+/HER2-	2.61
275	A0J6	275	TCGA-AO-A0J6	355	61	Stage IIA	Negative	Negative	Negative	ER-/HER2-	5.54818
276	A0J7	276	TCGA-AO-A0J7	356	71	Stage IIB	Positive	Positive	Negative	ER+/HER2-	0.837021
277	A0J8	277	TCGA-AO-A0J8	357	61	Stage IIA	Positive	Positive	Negative	ER+/HER2-	3.9894
278	A0J9	278	TCGA-AO-A0J9	358	61	Stage IIIC	Positive	Positive	Negative	ER+/HER2-	3.51476
279	A0JA	279	TCGA-AO-A0JA	359	36	Stage IIIC	Positive	Positive	Negative	ER+/HER2-	3.3722
280	A0JB	280	TCGA-AO-A0JB	360	50	Stage IIIA	Positive	Positive	Negative	ER+/HER2-	1.97911
281	A0JC	281	TCGA-AO-A0JC	361	64	Stage IIA	Positive	Positive	Negative	ER+/HER2-	7.4499
282	A0JD	282	TCGA-AO-A0JD	362	59	Stage IIIA	Positive	Positive	Negative	ER+/HER2-	4.19956
283	A0JE	283	TCGA-AO-A0JE	363	53	Stage IIIA	Negative	Negative	Positive	ER-/HER2+	5.13516
284	A0JF	284	TCGA-AO-A0JF	364	68	Stage IIA	Positive	Positive	Negative	ER+/HER2-	3.87651
285	A0JG	285	TCGA-AO-A0JG	365	49	Stage IIIA	Positive	Positive	Negative	ER+/HER2-	4.99038
286	A0JI	286	TCGA-AO-A0JI	366	56	Stage IIA	Positive	Negative	Negative	ER+/HER2-	2.9984
287	A0JJ	287	TCGA-AO-A0JJ	367	54	Stage IIB	Positive	Positive	Negative	ER+/HER2-	4.51196
288	A0JL	288	TCGA-AO-A0JL	368	59	Stage IIIA	Negative	Negative	Negative	ER-/HER2-	2.35681
289	A0JM	289	TCGA-AO-A0JM	369	40	Stage IIB	Positive	Positive	Positive	ER+/HER2+	3.53228
290	A0RE	290	TCGA-B6-A0RE	486	61	Stage X	Negative	Negative	Negative	ER-/HER2-	2.69348
291	A0RG	291	TCGA-B6-A0RG	487	26	Stage IIB	Negative	Negative	Negative	ER-/HER2-	1.8372
292	A0RH	292	TCGA-B6-A0RH	488	51	Stage IIA	Positive	Positive	Positive	ER+/HER2+	3.02113
293	A0RI	293	TCGA-B6-A0RI	489	44	Stage IIIB	Positive	Positive	Negative	ER+/HER2-	2.06619
294	A0RL	294	TCGA-B6-A0RL	490	60	Stage IIA	Positive	Positive	[Not Evaluated]	Unclassified	-2.26044
295	A0RM	295	TCGA-B6-A0RM	491	57	Stage X	Positive	Positive	Negative	ER+/HER2-	1.99506
296	A0RN	296	TCGA-B6-A0RN	492	60	Stage IA	Negative	Negative	Negative	ER-/HER2-	2.03073
297	A0RO	297	TCGA-B6-A0RO	493	71	Stage IIIB	Positive	Positive	Negative	ER+/HER2-	1.89782
298	A0RP	298	TCGA-B6-A0RP	494	73	Stage IIIB	Positive	Positive	Negative	ER+/HER2-	3.6221
299	A0RQ	299	TCGA-B6-A0RQ	495	68	Stage IIB	Positive	Positive	Negative	ER+/HER2-	2.46
300	A0RS	300	TCGA-B6-A0RS	496	38	Stage IIA	Negative	Negative	[Not Evaluated]	Unclassified	4.31616
301	A0RT	301	TCGA-B6-A0RT	497	39	Stage IIIA	Negative	Negative	Negative	ER-/HER2-	7.23015
302	A0RU	302	TCGA-B6-A0RU	498	49	Stage IA	Negative	Negative	Negative	ER-/HER2-	2.76672
303	A0RV	303	TCGA-B6-A0RV	499	42	Stage IIIA	Positive	Positive	Negative	ER+/HER2-	4.27599
304	A0RX	304	TCGA-BH-A0RX	643	59	Stage IIA	Negative	Negative	Negative	ER-/HER2-	6.57095
305	A0SB	305	TCGA-A1-A0SB	9	70	Stage I	Positive	Negative	Negative	ER+/HER2-	0.583155
306	A0SD	306	TCGA-A1-A0SD	10	59	Stage IIA	Positive	Positive	Negative	ER+/HER2-	3.62135
307	A0SE	307	TCGA-A1-A0SE	11	56	Stage I	Positive	Positive	Negative	ER+/HER2-	2.60877
308	A0SF	308	TCGA-A1-A0SF	12	54	Stage IIA	Positive	Positive	Negative	ER+/HER2-	4.39201
309	A0SG	309	TCGA-A1-A0SG	13	61	Stage IIB	Positive	Positive	Negative	ER+/HER2-	3.74353
310	A0SH	310	TCGA-A1-A0SH	14	39	Stage IIA	Negative	Positive	Equivocal	Unclassified	2.72789
311	A0SI	311	TCGA-A1-A0SI	15	52	Stage IIB	Positive	Positive	Negative	ER+/HER2-	5.18453
312	A0SJ	312	TCGA-A1-A0SJ	16	39	Stage IIIA	Positive	Positive	Negative	ER+/HER2-	3.77954
313	A0SK	313	TCGA-A1-A0SK	17	54	Stage IIA	Negative	Negative	Negative	ER-/HER2-	1.58982
314	A0SM	314	TCGA-A1-A0SM	18	77	Stage IIA	Positive	Negative	Positive	ER+/HER2+	2.68345
315	A0SN	315	TCGA-A1-A0SN	19	50	Stage IIA	Positive	Positive	Positive	ER+/HER2+	3.75534
316	A0SO	316	TCGA-A1-A0SO	20	67	Stage IIB	Negative	Negative	Equivocal	Unclassified	3.10966
317	A0SP	317	TCGA-A1-A0SP	21	40	Stage IIA	Negative	Negative	Negative	ER-/HER2-	3.75417
318	A0SQ	318	TCGA-A1-A0SQ	22	45	Stage IIB	Positive	Positive	Negative	ER+/HER2-	3.80832
319	A0ST	319	TCGA-A2-A0ST	66	62	Stage IIA	Negative	Negative	Negative	ER-/HER2-	6.89163
320	A0SU	320	TCGA-A2-A0SU	67	66	Stage IIA	Positive	Positive	Negative	ER+/HER2-	3.11961
321	A0SV	321	TCGA-A2-A0SV	68	63	Stage IV	Positive	Positive	Negative	ER+/HER2-	3.55719
322	A0SW	322	TCGA-A2-A0SW	69	82	Stage IV	Positive	Negative	Negative	ER+/HER2-	5.30313
323	A0SX	323	TCGA-A2-A0SX	70	48	Stage IA	Negative	Negative	Negative	ER-/HER2-	5.56607
324	A0SY	324	TCGA-A2-A0SY	71	62	Stage IIIA	Positive	Positive	Positive	ER+/HER2+	4.20941
325	A0T0	325	TCGA-A2-A0T0	72	59	Stage IIB	Negative	Negative	Negative	ER-/HER2-	3.5992
326	A0T1	326	TCGA-A2-A0T1	73	55	Stage IIIC	Negative	Negative	Positive	ER-/HER2+	5.35631
327	A0T2	327	TCGA-A2-A0T2	74	66	Stage IV	Negative	Negative	Negative	ER-/HER2-	3.5871
328	A0T3	328	TCGA-A2-A0T3	75	37	Stage IB	Positive	Positive	Negative	ER+/HER2-	3.97501
329	A0T4	329	TCGA-A2-A0T4	76	62	Stage IIA	Positive	Positive	Negative	ER+/HER2-	4.31727
330	A0T5	330	TCGA-A2-A0T5	77	39	Stage IIA	Positive	Positive	Negative	ER+/HER2-	3.62244
331	A0T6	331	TCGA-A2-A0T6	78	50	Stage IIB	Positive	Positive	Negative	ER+/HER2-	4.96259
332	A0T7	332	TCGA-A2-A0T7	79	51	Stage IIA	Positive	Positive	Negative	ER+/HER2-	3.36413
333	A0TP	333	TCGA-AR-A0TP	398	43	Stage IIA	Positive	Negative	Negative	ER+/HER2-	0.558349
334	A0TQ	334	TCGA-AR-A0TQ	399	27	Stage IIIA	Positive	Negative	Positive	ER+/HER2+	4.88966
335	A0TR	335	TCGA-AR-A0TR	400	68	Stage IIB	Positive	Positive	Negative	ER+/HER2-	3.02375
336	A0TS	336	TCGA-AR-A0TS	401	46	Stage IIB	Negative	Negative	Negative	ER-/HER2-	5.79341
337	A0TT	337	TCGA-AR-A0TT	402	53	Stage IIIA	Positive	Negative	Negative	ER+/HER2-	6.00726
338	A0TU	338	TCGA-AR-A0TU	403	35	Stage IIA	Negative	Negative	Negative	ER-/HER2-	5.17905
339	A0TV	339	TCGA-AR-A0TV	404	66	Stage IIA	Positive	Positive	Negative	ER+/HER2-	4.88529
340	A0TW	340	TCGA-AR-A0TW	405	50	Stage IIIA	Positive	Positive	Negative	ER+/HER2-	5.61851
341	A0TX	341	TCGA-AR-A0TX	406	64	Stage IIA	Positive	Positive	Positive	ER+/HER2+	5.89313
342	A0TY	342	TCGA-AR-A0TY	407	54	Stage IIA	Positive	Negative	Negative	ER+/HER2-	2.39759
343	A0TZ	343	TCGA-AR-A0TZ	408	43	Stage IIIA	Positive	Positive	Equivocal	Unclassified	2.77041
344	A0U0	344	TCGA-AR-A0U0	409	73	Stage IIB	Negative	Negative	Negative	ER-/HER2-	6.5145
345	A0U2	345	TCGA-AR-A0U2	410	47	Stage IIIA	Positive	Positive	Negative	ER+/HER2-	4.92266
346	A0U3	346	TCGA-AR-A0U3	411	59	Stage IIB	Positive	Positive	Negative	ER+/HER2-	3.59068
347	A0U4	347	TCGA-AR-A0U4	412	54	Stage IIA	Negative	Negative	Negative	ER-/HER2-	5.4301
348	A0W3	348	TCGA-BH-A0W3	644	58	Stage IIA	Positive	Positive	Equivocal	Unclassified	1.92077
349	A0W4	349	TCGA-BH-A0W4	645	46	Stage IIA	Positive	Positive	Negative	ER+/HER2-	2.35732
350	A0W5	350	TCGA-BH-A0W5	646	77	Stage IIA	Positive	Positive	Negative	ER+/HER2-	5.6672
351	A0W7	351	TCGA-BH-A0W7	647	49	Stage I	Positive	Positive	Negative	ER+/HER2-	5.1572
352	A0WA	352	TCGA-BH-A0WA	648	82	Stage I	Negative	Negative	Negative	ER-/HER2-	4.49859
353	A0WS	353	TCGA-B6-A0WS	500	58	Stage X	Positive	Positive	Negative	ER+/HER2-	5.03687
354	A0WT	354	TCGA-B6-A0WT	501	61	Stage IIB	Positive	Positive	Negative	ER+/HER2-	3.06063
355	A0WV	355	TCGA-B6-A0WV	502	67	Stage IIB	Positive	Positive	Negative	ER+/HER2-	-2.57458
356	A0WW	356	TCGA-B6-A0WW	503	58	Stage X	Positive	Positive	Negative	ER+/HER2-	3.07548
357	A0WX	357	TCGA-B6-A0WX	504	40	Stage IIIA	Negative	Negative	Negative	ER-/HER2-	3.8858
358	A0WY	358	TCGA-B6-A0WY	505	40	Stage IIIA	Positive	Negative	Negative	ER+/HER2-	4.63174
359	A0WZ	359	TCGA-B6-A0WZ	506	50	Stage IIB	Positive	Positive	Negative	ER+/HER2-	1.54173
360	A0X0	360	TCGA-B6-A0X0	507	54	Stage IA	Positive	Positive	Negative	ER+/HER2-	3.43594
361	A0X1	361	TCGA-B6-A0X1	508	48	Stage IV	Negative	Negative	Negative	ER-/HER2-	6.13088
362	A0X4	362	TCGA-B6-A0X4	509	62	Stage IIB	Positive	Positive	Negative	ER+/HER2-	0.263846
363	A0X5	363	TCGA-B6-A0X5	510	61	Stage IIB	Positive	Positive	Negative	ER+/HER2-	2.24319
364	A0X7	364	TCGA-B6-A0X7	511	62	Stage X	Positive	Positive	Negative	ER+/HER2-	2.54091
365	A0XL	365	TCGA-AN-A0XL	332	61	Stage IIA	Positive	Positive	Negative	ER+/HER2-	3.05632
366	A0XN	366	TCGA-AN-A0XN	333	68	Stage IIIA	Negative	Positive	Negative	ER-/HER2-	3.43407
367	A0XO	367	TCGA-AN-A0XO	334	59	Stage IIIA	Positive	Negative	Negative	ER+/HER2-	0.853831
368	A0XP	368	TCGA-AN-A0XP	335	69	Stage IIIA	Positive	Positive	Positive	ER+/HER2+	2.42862
369	A0XR	369	TCGA-AN-A0XR	336	55	Stage IIIA	Positive	Negative	Negative	ER+/HER2-	1.99338
370	A0XS	370	TCGA-AN-A0XS	337	63	Stage IIIA	Negative	Positive	Negative	ER-/HER2-	4.41281
371	A0XT	371	TCGA-AN-A0XT	338	54	Stage IIIA	Positive	Negative	Negative	ER+/HER2-	1.97056
372	A0XU	372	TCGA-AN-A0XU	339	54	Stage IIA	Negative	Negative	Negative	ER-/HER2-	5.28773
373	A0XV	373	TCGA-AN-A0XV	340	67	Stage IIIA	Positive	Positive	Positive	ER+/HER2+	3.86395
374	A0XW	374	TCGA-AN-A0XW	341	36	Stage IIIA	Positive	Positive	Positive	ER+/HER2+	5.70579
375	A0Y5	375	TCGA-AQ-A0Y5	392	70	Stage IIIA	Positive	Positive	Positive	ER+/HER2+	1.68869
376	A0YC	376	TCGA-A2-A0YC	80	59	Stage IIB	Positive	Positive	[Not Evaluated]	Unclassified	3.3827
377	A0YD	377	TCGA-A2-A0YD	81	63	Stage IIB	Positive	Positive	Negative	ER+/HER2-	4.35997
378	A0YE	378	TCGA-A2-A0YE	82	48	Stage IIB	Negative	Negative	Negative	ER-/HER2-	3.66364
379	A0YF	379	TCGA-A2-A0YF	83	67	Stage I	Positive	Negative	Negative	ER+/HER2-	2.65677
380	A0YG	380	TCGA-A2-A0YG	84	63	Stage IIIC	Positive	Positive	Positive	ER+/HER2+	3.13171
381	A0YH	381	TCGA-A2-A0YH	85	53	Stage IIIA	Positive	Positive	Negative	ER+/HER2-	5.01732
382	A0YI	382	TCGA-A2-A0YI	86	62	Stage I	Positive	Positive	Negative	ER+/HER2-	4.85197
383	A0YJ	383	TCGA-A2-A0YJ	87	39	Stage IIIA	Positive	Negative	Negative	ER+/HER2-	1.67363
384	A0YK	384	TCGA-A2-A0YK	88	61	Stage IIA	Positive	Negative	Negative	ER+/HER2-	5.86012
385	A0YL	385	TCGA-A2-A0YL	89	48	Stage IIIA	Positive	Positive	Negative	ER+/HER2-	3.83652
386	A0YM	386	TCGA-A2-A0YM	90	67	Stage IIA	Negative	Negative	Negative	ER-/HER2-	4.25001
387	A0YT	387	TCGA-A2-A0YT	91	56	Stage IIIB	Positive	Negative	Negative	ER+/HER2-	2.88572
388	A105	388	TCGA-E2-A105	876	79	Stage IIA	Positive	Positive	Negative	ER+/HER2-	2.212
389	A106	389	TCGA-E2-A106	877	34	Stage IB	Positive	Positive	Negative	ER+/HER2-	2.69246
390	A107	390	TCGA-E2-A107	878	54	Stage IIIA	Positive	Negative	Equivocal	Unclassified	2.16764
391	A108	391	TCGA-E2-A108	879	64	Stage IIIA	Positive	Positive	Negative	ER+/HER2-	6.30979
392	A109	392	TCGA-E2-A109	880	64	Stage IIA	Positive	Negative	Equivocal	Unclassified	3.57491
393	A10A	393	TCGA-E2-A10A	881	41	Stage IIB	Positive	Positive	Positive	ER+/HER2+	2.59217
394	A10B	394	TCGA-E2-A10B	882	67	Stage IIB	Positive	Positive	Negative	ER+/HER2-	3.69406
395	A10C	395	TCGA-E2-A10C	883	54	Stage IIB	Positive	Positive	Negative	ER+/HER2-	3.89634
396	A10E	396	TCGA-E2-A10E	884	64	Stage IIA	Positive	Positive	Negative	ER+/HER2-	3.71022
397	A10F	397	TCGA-E2-A10F	885	47	Stage IIA	Positive	Positive	Negative	ER+/HER2-	3.62194
398	A124	398	TCGA-AO-A124	370	38	Stage IIA	Negative	Negative	Negative	ER-/HER2-	3.90003
399	A125	399	TCGA-AO-A125	371	72	Stage IIA	Positive	Positive	Negative	ER+/HER2-	2.20065
400	A126	400	TCGA-AO-A126	372	39	Stage IIA	Positive	Positive	Negative	ER+/HER2-	2.93071
401	A128	401	TCGA-AO-A128	373	61	Stage IIA	Negative	Negative	Negative	ER-/HER2-	7.77034
402	A129	402	TCGA-AO-A129	374	29	Stage IIB	Negative	Negative	Negative	ER-/HER2-	5.20573
403	A12A	403	TCGA-AO-A12A	375	47	Stage IIA	Positive	Positive	Negative	ER+/HER2-	3.86581
404	A12B	404	TCGA-AO-A12B	376	63	Stage IIA	Positive	Positive	Negative	ER+/HER2-	1.4916
405	A12C	405	TCGA-AO-A12C	377	42	Stage IIB	Positive	Positive	Positive	ER+/HER2+	1.99728
406	A12D	406	TCGA-AO-A12D	378	43	Stage IIA	Negative	Negative	Positive	ER-/HER2+	5.16557
407	A12E	407	TCGA-AO-A12E	379	51	Stage IIB	Positive	Positive	Negative	ER+/HER2-	3.02219
408	A12F	408	TCGA-AO-A12F	380	36	Stage IIA	Negative	Negative	Negative	ER-/HER2-	2.24812
409	A12G	409	TCGA-AO-A12G	381	75	Stage IIA	Positive	Positive	Positive	ER+/HER2+	2.50043
410	A12H	410	TCGA-AO-A12H	382	69	Stage IIA	Positive	Positive	Negative	ER+/HER2-	1.85073
411	A12K	411	TCGA-C8-A12K	750	80	Stage IIB	Negative	[Not Evaluated]	Negative	ER-/HER2-	6.16569
412	A12L	412	TCGA-C8-A12L	751	67	Stage IIA	Negative	Negative	Positive	ER-/HER2+	3.86987
413	A12M	413	TCGA-C8-A12M	752	70	Stage IIA	Positive	Negative	Negative	ER+/HER2-	3.89277
414	A12N	414	TCGA-C8-A12N	753	58	Stage IIA	Positive	Positive	Negative	ER+/HER2-	2.94694
415	A12O	415	TCGA-C8-A12O	754	50	Stage IIA	Positive	Positive	Negative	ER+/HER2-	3.92523
416	A12P	416	TCGA-C8-A12P	755	55	Stage IIB	Negative	Negative	Positive	ER-/HER2+	3.71079
417	A12Q	417	TCGA-C8-A12Q	756	78	Stage IIIA	Negative	Negative	Positive	ER-/HER2+	3.47806
418	A12T	418	TCGA-C8-A12T	757	43	Stage IIA	Positive	Positive	Positive	ER+/HER2+	4.12956
419	A12U	419	TCGA-C8-A12U	758	46	Stage IIB	Positive	Positive	Negative	ER+/HER2-	5.23372
420	A12V	420	TCGA-C8-A12V	759	55	Stage IIA	Negative	Negative	Negative	ER-/HER2-	7.05956
421	A12W	421	TCGA-C8-A12W	760	49	Stage IIIB	Positive	Positive	Negative	ER+/HER2-	3.30559
422	A12X	422	TCGA-C8-A12X	761	62	Stage IIB	Positive	Positive	Negative	ER+/HER2-	2.9087
423	A12Y	423	TCGA-C8-A12Y	762	44	Stage IIB	Positive	[Not Evaluated]	Negative	ER+/HER2-	2.96011
424	A12Z	424	TCGA-C8-A12Z	763	45	Stage IIB	Negative	Negative	Positive	ER-/HER2+	2.13837
425	A130	425	TCGA-C8-A130	764	52	Stage IIIA	Positive	Positive	Negative	ER+/HER2-	2.86993
426	A131	426	TCGA-C8-A131	765	82	Stage IIIA	Negative	Negative	Negative	ER-/HER2-	3.16433
427	A132	427	TCGA-C8-A132	766	56	Stage IIB	Positive	Positive	Positive	ER+/HER2+	5.23925
428	A133	428	TCGA-C8-A133	767	65	Stage IIIA	Positive	Positive	Negative	ER+/HER2-	1.43118
429	A134	429	TCGA-C8-A134	768	52	Stage IIA	Negative	Negative	Negative	ER-/HER2-	4.93179
430	A135	430	TCGA-C8-A135	769	64	Stage IIB	Negative	Negative	Positive	ER-/HER2+	3.09299
431	A137	431	TCGA-C8-A137	770	34	Stage IIB	Negative	Negative	Positive	ER-/HER2+	1.57279
432	A138	432	TCGA-C8-A138	771	54	Stage IIIA	Positive	Negative	Negative	ER+/HER2-	5.19078
433	A13D	433	TCGA-A7-A13D	139	46	Stage IIA	Negative	Positive	Negative	ER-/HER2-	1.79605
434	A13E	434	TCGA-A7-A13E	141	62	Stage IIB	Positive	Negative	Negative	ER+/HER2-	2.38492
435	A13F	435	TCGA-A7-A13F	142	44	Stage IIIA	Positive	Positive	Negative	ER+/HER2-	1.25894
436	A13G	436	TCGA-A7-A13G	145	79	Stage IIA	Positive	Positive	Negative	ER+/HER2-	1.29197
437	A13H	437	TCGA-A7-A13H	146	61	Stage IIB	Positive	Positive	Equivocal	Unclassified	4.1644
438	A13Y	438	TCGA-D8-A13Y	798	52	Stage IA	Positive	Positive	Negative	ER+/HER2-	-1.85333
439	A13Z	439	TCGA-D8-A13Z	799	51	[Not Available]	Negative	Negative	Negative	ER-/HER2-	4.69203
440	A140	440	TCGA-D8-A140	800	62	Stage IIB	Positive	Positive	Positive	ER+/HER2+	4.16073
441	A141	441	TCGA-D8-A141	801	40	[Not Available]	Positive	Positive	Negative	ER+/HER2-	6.37554
442	A142	442	TCGA-D8-A142	802	74	Stage IIB	Negative	Negative	Negative	ER-/HER2-	3.79461
443	A143	443	TCGA-D8-A143	803	51	Stage IIA	Negative	Negative	Negative	ER-/HER2-	4.6261
444	A145	444	TCGA-D8-A145	804	80	Stage IIA	Positive	Positive	Negative	ER+/HER2-	4.27384
445	A146	445	TCGA-D8-A146	805	57	Stage IIA	Positive	Positive	Negative	ER+/HER2-	4.07173
446	A147	446	TCGA-D8-A147	806	45	[Not Available]	Negative	Negative	Negative	ER-/HER2-	4.34083
447	A14N	447	TCGA-E2-A14N	886	37	Stage IIB	Negative	Negative	Negative	ER-/HER2-	4.14588
448	A14O	448	TCGA-E2-A14O	887	76	Stage IIIA	Positive	Positive	Negative	ER+/HER2-	2.15591
449	A14P	449	TCGA-E2-A14P	888	79	Stage IIIC	Negative	Negative	Positive	ER-/HER2+	4.34206
450	A14Q	450	TCGA-E2-A14Q	889	50	Stage IIA	Positive	Positive	Negative	ER+/HER2-	3.63603
451	A14R	451	TCGA-E2-A14R	890	62	Stage IIA	Negative	Negative	Negative	ER-/HER2-	4.98758
452	A14S	452	TCGA-E2-A14S	891	65	Stage I	Positive	Positive	Negative	ER+/HER2-	2.53527
453	A14T	453	TCGA-E2-A14T	892	52	Stage IIA	Positive	Positive	Negative	ER+/HER2-	2.32056
454	A14U	454	TCGA-E2-A14U	893	74	Stage I	Positive	Positive	Equivocal	Unclassified	2.19839
455	A14V	455	TCGA-E2-A14V	894	53	Stage IIB	Positive	Positive	Positive	ER+/HER2+	2.13379
456	A14W	456	TCGA-E2-A14W	895	78	Stage IIA	Positive	Positive	Negative	ER+/HER2-	0.452387
457	A14X	457	TCGA-E2-A14X	896	55	Stage IIIA	Negative	Negative	Negative	ER-/HER2-	4.56699
458	A14Y	458	TCGA-E2-A14Y	897	35	Stage IIA	Positive	Positive	Positive	ER+/HER2+	3.17442
459	A14Z	459	TCGA-E2-A14Z	898	64	Stage I	Positive	Positive	Negative	ER+/HER2-	5.02586
460	A150	460	TCGA-E2-A150	899	48	Stage IIA	Negative	Negative	Negative	ER-/HER2-	4.27771
461	A152	461	TCGA-E2-A152	900	56	Stage I	Positive	Negative	Positive	ER+/HER2+	2.16254
462	A153	462	TCGA-E2-A153	902	51	Stage IIB	Positive	Positive	Negative	ER+/HER2-	2.69123
463	A154	463	TCGA-E2-A154	903	68	Stage I	Positive	Positive	Negative	ER+/HER2-	0.956225
464	A155	464	TCGA-E2-A155	904	58	Stage IIB	Positive	Negative	Negative	ER+/HER2-	1.67623
465	A156	465	TCGA-E2-A156	905	61	Stage I	Positive	Positive	Negative	ER+/HER2-	1.73183
466	A158	466	TCGA-E2-A158	906	43	Stage IIA	Negative	Negative	Negative	ER-/HER2-	2.56634
467	A159	467	TCGA-E2-A159	908	50	Stage IIA	Negative	Negative	Negative	ER-/HER2-	6.00881
468	A15A	468	TCGA-E2-A15A	910	45	Stage IIIC	Positive	Positive	Negative	ER+/HER2-	4.56828
469	A15C	469	TCGA-E2-A15C	911	61	Stage I	Positive	Positive	Equivocal	Unclassified	3.95112
470	A15D	470	TCGA-E2-A15D	912	47	Stage IIA	Positive	Positive	Negative	ER+/HER2-	3.60699
471	A15E	471	TCGA-E2-A15E	914	40	Stage IIA	Positive	Positive	Positive	ER+/HER2+	2.96831
472	A15F	472	TCGA-E2-A15F	915	64	Stage I	Positive	Positive	Negative	ER+/HER2-	3.75255
473	A15G	473	TCGA-E2-A15G	916	76	Stage IIA	Positive	Positive	Negative	ER+/HER2-	2.24482
474	A15H	474	TCGA-E2-A15H	917	38	Stage IIA	Positive	Positive	Positive	ER+/HER2+	2.50802
475	A15I	475	TCGA-E2-A15I	919	44	Stage IIA	Positive	Positive	Negative	ER+/HER2-	4.66078
476	A15J	476	TCGA-E2-A15J	920	51	Stage I	Positive	Positive	Negative	ER+/HER2-	3.35115
477	A15K	477	TCGA-E2-A15K	922	58	Stage IIA	Positive	Positive	Negative	ER+/HER2-	4.769
478	A15L	478	TCGA-E2-A15L	924	65	Stage IIA	Positive	Positive	Negative	ER+/HER2-	1.43677
479	A15M	479	TCGA-E2-A15M	926	66	Stage IIA	Positive	Positive	Negative	ER+/HER2-	5.04331
480	A15O	480	TCGA-E2-A15O	927	89	Stage I	Positive	Positive	Negative	ER+/HER2-	2.2487
481	A15P	481	TCGA-E2-A15P	928	61	Stage IA	Positive	Positive	Negative	ER+/HER2-	2.57123
482	A15R	482	TCGA-E2-A15R	929	64	Stage IIA	Positive	Positive	Negative	ER+/HER2-	0.902089
483	A15S	483	TCGA-E2-A15S	930	34	Stage IIB	Positive	Negative	Negative	ER+/HER2-	1.7205
484	A15T	484	TCGA-E2-A15T	931	65	Stage IIA	Positive	Positive	Equivocal	Unclassified	2.22418
485	A18F	485	TCGA-BH-A18F	649	50	Stage IIA	Positive	Positive	Negative	ER+/HER2-	4.22163
486	A18G	486	TCGA-BH-A18G	650	81	Stage IA	Negative	Negative	Negative	ER-/HER2-	2.73612
487	A18H	487	TCGA-BH-A18H	651	63	Stage IA	Positive	Positive	Positive	ER+/HER2+	6.05197
488	A18I	488	TCGA-BH-A18I	652	53	Stage IIA	Positive	Positive	Positive	ER+/HER2+	4.72196
489	A18J	489	TCGA-BH-A18J	653	56	Stage IV	Positive	Positive	Negative	ER+/HER2-	2.0625
490	A18K	490	TCGA-BH-A18K	656	46	Stage I	Positive	Positive	Negative	ER+/HER2-	3.68907
491	A18L	491	TCGA-BH-A18L	658	50	Stage IIIA	Positive	Positive	Negative	ER+/HER2-	2.86384
492	A18M	492	TCGA-BH-A18M	659	39	Stage IIIA	Positive	Positive	Positive	ER+/HER2+	3.5213
493	A18N	493	TCGA-BH-A18N	661	88	Stage IIA	Positive	Positive	Negative	ER+/HER2-	1.08018
494	A18P	494	TCGA-BH-A18P	663	60	Stage I	Positive	Negative	Positive	ER+/HER2+	4.52158
495	A18Q	495	TCGA-BH-A18Q	665	56	Stage IIB	Negative	Negative	Positive	ER-/HER2+	4.94776
496	A18R	496	TCGA-BH-A18R	667	50	Stage IIA	Positive	Negative	Positive	ER+/HER2+	3.71212
497	A18S	497	TCGA-BH-A18S	669	79	Stage I	Positive	Positive	Negative	ER+/HER2-	1.31507
498	A18T	498	TCGA-BH-A18T	671	70	Stage IIA	Negative	Negative	Positive	ER-/HER2+	3.69886
499	A18U	499	TCGA-BH-A18U	673	72	Stage IIIA	Positive	Positive	Positive	ER+/HER2+	3.70836
500	A18V	500	TCGA-BH-A18V	676	48	Stage IIB	Negative	Negative	Negative	ER-/HER2-	5.33896
501	A1AH	501	TCGA-AR-A1AH	413	51	Stage IIB	Positive	Negative	Negative	ER+/HER2-	1.41856
502	A1AI	502	TCGA-AR-A1AI	414	47	Stage IIA	Negative	Negative	Negative	ER-/HER2-	5.92174
503	A1AJ	503	TCGA-AR-A1AJ	415	83	Stage I	Positive	Negative	Negative	ER+/HER2-	6.58061
504	A1AK	504	TCGA-AR-A1AK	416	70	Stage I	Positive	Positive	Negative	ER+/HER2-	5.03502
505	A1AL	505	TCGA-AR-A1AL	417	60	Stage IIIA	Positive	Positive	Negative	ER+/HER2-	3.71532
506	A1AM	506	TCGA-AR-A1AM	418	52	Stage IIIA	Positive	Positive	Equivocal	Unclassified	3.56324
507	A1AN	507	TCGA-AR-A1AN	419	46	Stage IIA	Positive	Positive	Negative	ER+/HER2-	2.92641
508	A1AO	508	TCGA-AR-A1AO	420	47	Stage IIA	Positive	Negative	Negative	ER+/HER2-	5.59348
509	A1AP	509	TCGA-AR-A1AP	421	80	Stage I	Positive	Positive	Negative	ER+/HER2-	3.70596
510	A1AQ	510	TCGA-AR-A1AQ	422	49	Stage IIA	Negative	Negative	Negative	ER-/HER2-	5.96747
511	A1AR	511	TCGA-AR-A1AR	423	50	Stage IIIA	Negative	Negative	Negative	ER-/HER2-	4.95287
512	A1AS	512	TCGA-AR-A1AS	424	54	Stage IIB	Positive	Positive	Negative	ER+/HER2-	1.058
513	A1AT	513	TCGA-AR-A1AT	425	62	Stage IIA	Positive	Positive	Positive	ER+/HER2+	5.33395
514	A1AU	514	TCGA-AR-A1AU	426	39	Stage IIIA	Positive	Positive	Negative	ER+/HER2-	2.54911
515	A1AV	515	TCGA-AR-A1AV	427	68	Stage IIB	Positive	Positive	Negative	ER+/HER2-	1.70933
516	A1AW	516	TCGA-AR-A1AW	428	65	Stage IIA	Positive	Positive	Negative	ER+/HER2-	7.24916
517	A1AX	517	TCGA-AR-A1AX	429	64	Stage I	Positive	Positive	Positive	ER+/HER2+	6.3086
518	A1AY	518	TCGA-AR-A1AY	430	65	Stage I	Negative	Negative	Negative	ER-/HER2-	2.76682
519	A1AZ	519	TCGA-E2-A1AZ	932	63	Stage IIB	Negative	Negative	Negative	ER-/HER2-	5.52302
520	A1B0	520	TCGA-E2-A1B0	933	50	Stage IIIA	Negative	Negative	Positive	ER-/HER2+	4.12892
521	A1B1	521	TCGA-E2-A1B1	934	45	Stage IIB	Positive	Positive	Positive	ER+/HER2+	5.18096
522	A1B4	522	TCGA-E2-A1B4	935	74	Stage IIIA	Positive	Positive	Negative	ER+/HER2-	1.56755
523	A1B5	523	TCGA-E2-A1B5	936	46	Stage IIA	Positive	Positive	Negative	ER+/HER2-	5.58938
524	A1B6	524	TCGA-E2-A1B6	937	44	Stage IIA	Negative	Negative	Negative	ER-/HER2-	6.24457
525	A1BC	525	TCGA-E2-A1BC	938	63	Stage IA	Positive	Positive	Negative	ER+/HER2-	2.99113
526	A1BD	526	TCGA-E2-A1BD	940	53	Stage IIA	Positive	Positive	Negative	ER+/HER2-	2.39414
527	A1EN	527	TCGA-BH-A1EN	678	78	Stage IIA	Negative	Negative	Positive	ER-/HER2+	1.08572
528	A1EO	528	TCGA-BH-A1EO	680	68	Stage IIA	Positive	Positive	Negative	ER+/HER2-	3.61642
529	A1ES	529	TCGA-BH-A1ES	681	35	Stage IIB	Positive	Positive	Negative	ER+/HER2-	1.81004
530	A1ET	530	TCGA-BH-A1ET	684	55	Stage I	Positive	Positive	Negative	ER+/HER2-	3.09285
531	A1EU	531	TCGA-BH-A1EU	685	83	Stage I	Positive	Positive	Negative	ER+/HER2-	5.4305
532	A1EV	532	TCGA-BH-A1EV	687	45	Stage IIIA	Positive	Positive	Positive	ER+/HER2+	0.688475
533	A1EW	533	TCGA-BH-A1EW	689	38	Stage IIA	Negative	Negative	Negative	ER-/HER2-	4.87126
534	A1EX	534	TCGA-BH-A1EX	691	67	Stage IIB	Positive	Positive	Positive	ER+/HER2+	3.50625
535	A1EY	535	TCGA-BH-A1EY	692	79	Stage IIA	Positive	Positive	Negative	ER+/HER2-	4.69706
536	A1F0	536	TCGA-BH-A1F0	693	80	Stage IIA	Negative	Indeterminate	Negative	ER-/HER2-	6.29385
537	A1F2	537	TCGA-BH-A1F2	696	53	Stage IIIB	Positive	Positive	Positive	ER+/HER2+	1.77946
538	A1F5	538	TCGA-BH-A1F5	697	62	Stage IIA	Positive	Positive	Negative	ER+/HER2-	2.08229
539	A1F6	539	TCGA-BH-A1F6	698	51	[Not Available]	Negative	Negative	Negative	ER-/HER2-	4.57592
540	A1F8	540	TCGA-BH-A1F8	700	90	Stage IIIB	Positive	Positive	Positive	ER+/HER2+	2.84365
541	A1FB	541	TCGA-BH-A1FB	702	60	Stage IIB	Positive	Positive	Negative	ER+/HER2-	5.56951
542	A1FC	542	TCGA-BH-A1FC	705	78	Stage IIA	Negative	Negative	Negative	ER-/HER2-	5.98222
543	A1FD	543	TCGA-BH-A1FD	706	68	Stage I	Positive	Positive	Negative	ER+/HER2-	2.88717
544	A1FE	544	TCGA-BH-A1FE	710	31	Stage IIB	Positive	Positive	Negative	ER+/HER2-	5.49317
545	A1FG	545	TCGA-BH-A1FG	712	88	Stage I	Positive	Positive	Negative	ER+/HER2-	1.6729
546	A1FH	546	TCGA-BH-A1FH	714	47	Stage IV	Positive	Negative	Negative	ER+/HER2-	3.971
547	A1FJ	547	TCGA-BH-A1FJ	715	66	Stage IIIA	Negative	Positive	Negative	ER-/HER2-	1.40149
548	A1FL	548	TCGA-BH-A1FL	717	69	Stage IIB	Positive	Positive	Negative	ER+/HER2-	3.11513
549	A1FM	549	TCGA-BH-A1FM	718	44	Stage IIIA	Positive	Negative	Negative	ER+/HER2-	1.38778
550	A1FN	550	TCGA-BH-A1FN	720	34	Stage IIA	Positive	Positive	Negative	ER+/HER2-	3.10688
551	A1FR	551	TCGA-BH-A1FR	723	73	Stage IIIB	Positive	Positive	Negative	ER+/HER2-	3.48181
552	A1FU	552	TCGA-BH-A1FU	725	44	Stage IA	Negative	Negative	Positive	ER-/HER2+	4.63994
553	A1FV	553	TCGA-A2-A1FV	92	74	Stage IIB	Positive	Positive	Negative	ER+/HER2-	1.74892
554	A1FW	554	TCGA-A2-A1FW	93	62	Stage IIIA	Positive	Negative	Negative	ER+/HER2-	2.96145
555	A1FX	555	TCGA-A2-A1FX	94	61	Stage IIIA	Positive	Positive	Negative	ER+/HER2-	2.87817
556	A1FZ	556	TCGA-A2-A1FZ	95	63	Stage IIA	Positive	Positive	Negative	ER+/HER2-	2.92914
557	A1G0	557	TCGA-A2-A1G0	96	49	Stage IIB	Positive	Positive	Positive	ER+/HER2+	4.57671
558	A1G1	558	TCGA-A2-A1G1	97	85	Stage IIB	Negative	Negative	Positive	ER-/HER2+	5.08242
559	A1G4	559	TCGA-A2-A1G4	98	71	Stage IIIA	Positive	Positive	Negative	ER+/HER2-	2.80747
560	A1G6	560	TCGA-A2-A1G6	99	50	Stage IIIA	Negative	Negative	Negative	ER-/HER2-	3.06978
561	A1H2	561	TCGA-AQ-A1H2	393	84	Stage IIIA	Positive	Positive	Negative	ER+/HER2-	2.20873
562	A1H3	562	TCGA-AQ-A1H3	394	49	Stage IIIC	Positive	Positive	Negative	ER+/HER2-	4.08912
563	A1HE	563	TCGA-C8-A1HE	772	59	Stage IIA	Positive	Positive	Negative	ER+/HER2-	2.1906
564	A1HF	564	TCGA-C8-A1HF	773	48	Stage IIA	Negative	Positive	Positive	ER-/HER2+	5.42856
565	A1HG	565	TCGA-C8-A1HG	774	50	Stage IIA	Positive	Positive	Negative	ER+/HER2-	5.53069
566	A1HI	566	TCGA-C8-A1HI	775	40	Stage IIIA	Positive	Positive	Negative	ER+/HER2-	2.22628
567	A1HJ	567	TCGA-C8-A1HJ	776	53	Stage IIA	Negative	Negative	Negative	ER-/HER2-	3.50498
568	A1HK	568	TCGA-C8-A1HK	777	53	Stage IIB	Negative	Negative	Positive	ER-/HER2+	3.23056
569	A1HL	569	TCGA-C8-A1HL	778	38	Stage IIIA	Positive	Negative	Equivocal	Unclassified	2.10033
570	A1HM	570	TCGA-C8-A1HM	779	74	Stage IIA	Positive	Positive	Negative	ER+/HER2-	7.02498
571	A1HN	571	TCGA-C8-A1HN	780	56	Stage IIA	Positive	Positive	Equivocal	Unclassified	2.4164
572	A1HO	572	TCGA-C8-A1HO	781	34	Stage IIIC	Positive	Positive	Negative	ER+/HER2-	3.21184
573	A1IE	573	TCGA-E2-A1IE	941	61	Stage IIB	Positive	Positive	Negative	ER+/HER2-	0.902452
574	A1IF	574	TCGA-E2-A1IF	942	74	Stage I	Positive	Positive	Negative	ER+/HER2-	2.48944
575	A1IG	575	TCGA-E2-A1IG	944	45	Stage IIB	Positive	Positive	Negative	ER+/HER2-	2.00654
576	A1IH	576	TCGA-E2-A1IH	945	80	Stage I	Positive	Positive	Negative	ER+/HER2-	4.85538
577	A1II	577	TCGA-E2-A1II	946	51	Stage I	Negative	Positive	Negative	ER-/HER2-	6.914
578	A1IJ	578	TCGA-E2-A1IJ	947	57	Stage I	Positive	Positive	Negative	ER+/HER2-	4.25607
579	A1IK	579	TCGA-E2-A1IK	948	71	Stage IIA	Positive	Positive	Negative	ER+/HER2-	4.04962
580	A1IL	580	TCGA-E2-A1IL	949	78	Stage IIA	Positive	Positive	Negative	ER+/HER2-	3.13828
581	A1IN	581	TCGA-E2-A1IN	950	60	Stage I	Positive	Positive	Negative	ER+/HER2-	1.9346
582	A1IO	582	TCGA-E2-A1IO	951	37	Stage I	Positive	Positive	Negative	ER+/HER2-	4.3031
583	A1IU	583	TCGA-E2-A1IU	952	60	Stage IA	Positive	Positive	Negative	ER+/HER2-	3.66158
584	A1IW	584	TCGA-EW-A1IW	1057	80	Stage IIB	Positive	Positive	Positive	ER+/HER2+	4.07147
585	A1IX	585	TCGA-EW-A1IX	1058	48	Stage IIA	Positive	Positive	Negative	ER+/HER2-	3.41328
586	A1IY	586	TCGA-EW-A1IY	1059	38	Stage I	Positive	Positive	Negative	ER+/HER2-	5.40735
587	A1IZ	587	TCGA-EW-A1IZ	1060	53	Stage IIIA	Positive	Positive	Negative	ER+/HER2-	6.55406
588	A1J1	588	TCGA-EW-A1J1	1061	38	Stage IIB	Positive	Positive	Negative	ER+/HER2-	4.47701
589	A1J2	589	TCGA-EW-A1J2	1062	50	Stage IIB	Positive	Positive	Negative	ER+/HER2-	4.08359
590	A1J3	590	TCGA-EW-A1J3	1063	61	Stage IA	Positive	Positive	Positive	ER+/HER2+	2.5225
591	A1J5	591	TCGA-EW-A1J5	1064	59	Stage IIB	Positive	Positive	Negative	ER+/HER2-	5.41002
592	A1J6	592	TCGA-EW-A1J6	1065	70	Stage I	Positive	Positive	Negative	ER+/HER2-	3.88027
593	A1J8	593	TCGA-D8-A1J8	807	77	Stage IIB	Positive	Positive	Negative	ER+/HER2-	5.70269
594	A1J9	594	TCGA-D8-A1J9	808	48	Stage IA	Positive	Negative	Positive	ER+/HER2+	3.17627
595	A1JA	595	TCGA-D8-A1JA	809	60	[Not Available]	Negative	Negative	Positive	ER-/HER2+	2.94552
596	A1JB	596	TCGA-D8-A1JB	810	54	Stage IIB	Positive	Positive	Negative	ER+/HER2-	5.69465
597	A1JC	597	TCGA-D8-A1JC	811	59	Stage IIIA	Positive	Positive	Negative	ER+/HER2-	4.44479
598	A1JD	598	TCGA-D8-A1JD	812	41	Stage IIB	Positive	Positive	Negative	ER+/HER2-	4.09931
599	A1JE	599	TCGA-D8-A1JE	813	62	Stage IIA	Positive	Positive	Negative	ER+/HER2-	2.57962
600	A1JF	600	TCGA-D8-A1JF	814	79	Stage IIIA	Negative	Negative	Negative	ER-/HER2-	2.95503
601	A1JH	601	TCGA-D8-A1JH	816	56	Stage IA	Positive	Positive	Negative	ER+/HER2-	3.81989
602	A1JI	602	TCGA-D8-A1JI	817	54	Stage IIA	Positive	Positive	Negative	ER+/HER2-	3.08336
603	A1JJ	603	TCGA-D8-A1JJ	818	54	Stage IIA	Positive	Positive	Negative	ER+/HER2-	2.73098
604	A1JK	604	TCGA-D8-A1JK	819	90	Stage IIA	Negative	Positive	Negative	ER-/HER2-	5.4964
605	A1JL	605	TCGA-D8-A1JL	820	72	Stage IIA	Negative	Negative	Negative	ER-/HER2-	6.09763
606	A1JM	606	TCGA-D8-A1JM	821	59	Stage IIB	Positive	Negative	Negative	ER+/HER2-	4.15688
607	A1JN	607	TCGA-D8-A1JN	822	80	Stage IIIC	Positive	Positive	Negative	ER+/HER2-	3.23385
608	A1JP	608	TCGA-D8-A1JP	823	73	Stage IA	Positive	Positive	Negative	ER+/HER2-	3.09562
609	A1JS	609	TCGA-D8-A1JS	824	77	Stage IA	Positive	Positive	Negative	ER+/HER2-	2.974
610	A1JT	610	TCGA-D8-A1JT	825	70	Stage IIA	Positive	Positive	Negative	ER+/HER2-	3.34513
611	A1JU	611	TCGA-D8-A1JU	826	51	Stage IA	Positive	Positive	Negative	ER+/HER2-	3.9961
612	A1KF	612	TCGA-B6-A1KF	513	68	Stage IIB	Negative	Negative	Positive	ER-/HER2+	0.66654
613	A1KI	613	TCGA-B6-A1KI	514	63	Stage I	Positive	Positive	Negative	ER+/HER2-	2.42468
614	A1KN	614	TCGA-B6-A1KN	515	57	Stage IIIB	Negative	Negative	Positive	ER-/HER2+	3.74448
615	A1KO	615	TCGA-AO-A1KO	383	46	Stage IIB	Positive	Positive	Negative	ER+/HER2-	2.62023
616	A1KP	616	TCGA-AO-A1KP	384	77	Stage IIA	Positive	Positive	Negative	ER+/HER2-	1.31903
617	A1KQ	617	TCGA-AO-A1KQ	385	84	Stage IIIB	Positive	Positive	Negative	ER+/HER2-	4.52046
618	A1KR	618	TCGA-AO-A1KR	386	51	Stage IIA	Negative	Negative	Negative	ER-/HER2-	4.25533
619	A1KS	619	TCGA-AO-A1KS	387	69	Stage IIA	Positive	Positive	Negative	ER+/HER2-	2.88323
620	A1KT	620	TCGA-AO-A1KT	388	78	Stage IIA	Positive	Positive	Negative	ER+/HER2-	4.16303
621	A1L6	621	TCGA-E2-A1L6	953	44	Stage IIA	Positive	Positive	Negative	ER+/HER2-	4.00592
622	A1L7	622	TCGA-E2-A1L7	955	40	Stage IIIA	Negative	Negative	Negative	ER-/HER2-	5.65673
623	A1L8	623	TCGA-E2-A1L8	956	52	Stage IIA	Positive	Positive	Negative	ER+/HER2-	2.91143
624	A1L9	624	TCGA-E2-A1L9	957	40	Stage IIA	Positive	Positive	Negative	ER+/HER2-	3.00101
625	A1LA	625	TCGA-E2-A1LA	958	59	Stage IIA	Positive	Positive	Negative	ER+/HER2-	5.25767
626	A1LB	626	TCGA-E2-A1LB	959	41	Stage IIB	Negative	Negative	Positive	ER-/HER2+	1.65805
627	A1LE	627	TCGA-E2-A1LE	961	71	Stage IIIC	Negative	Negative	Positive	ER-/HER2+	4.22316
628	A1LG	628	TCGA-E2-A1LG	962	50	Stage IIA	Negative	Negative	Negative	ER-/HER2-	4.53438
629	A1LH	629	TCGA-E2-A1LH	963	59	Stage I	Negative	Negative	Negative	ER-/HER2-	5.47938
630	A1LI	630	TCGA-E2-A1LI	965	57	Stage IIB	Negative	Negative	Negative	ER-/HER2-	4.61814
631	A1LK	631	TCGA-E2-A1LK	966	84	Stage IIIC	Negative	Negative	Negative	ER-/HER2-	1.79715
632	A1LL	632	TCGA-E2-A1LL	967	73	Stage IIIA	Negative	Negative	Negative	ER-/HER2-	2.85324
633	A1LS	633	TCGA-E2-A1LS	969	46	Stage IA	Negative	Negative	Negative	ER-/HER2-	0.478078
634	A1N3	634	TCGA-E9-A1N3	980	70	Stage IIIA	Positive	[Not Evaluated]	Negative	ER+/HER2-	1.46236
635	A1N4	635	TCGA-E9-A1N4	981	41	Stage IIIA	Positive	Positive	Positive	ER+/HER2+	5.63165
636	A1N5	636	TCGA-E9-A1N5	983	45	Stage IIB	Positive	Positive	Positive	ER+/HER2+	4.20035
637	A1N6	637	TCGA-E9-A1N6	986	52	Stage IIB	Positive	Positive	Positive	ER+/HER2+	3.1121
638	A1N8	638	TCGA-E9-A1N8	987	48	Stage IIA	Negative	[Not Evaluated]	Negative	ER-/HER2-	2.76298
639	A1N9	639	TCGA-E9-A1N9	988	58	Stage IIA	Negative	Positive	Positive	ER-/HER2+	3.51593
640	A1NA	640	TCGA-E9-A1NA	991	58	Stage IIA	Positive	Positive	Positive	ER+/HER2+	2.9348
641	A1NC	641	TCGA-E9-A1NC	992	61	Stage IIB	Negative	Positive	Positive	ER-/HER2+	4.91284
642	A1ND	642	TCGA-E9-A1ND	994	75	Stage IIB	Negative	Negative	Positive	ER-/HER2+	6.39938
643	A1NE	643	TCGA-E9-A1NE	995	28	Stage IIB	Positive	Positive	Negative	ER+/HER2-	6.38657
644	A1NF	644	TCGA-E9-A1NF	996	60	Stage IIA	Positive	Positive	Negative	ER+/HER2-	3.26339
645	A1NG	645	TCGA-E9-A1NG	998	62	Stage IIA	Positive	Positive	Negative	ER+/HER2-	2.61997
646	A1NH	646	TCGA-E9-A1NH	1000	71	Stage IIB	Positive	Positive	Negative	ER+/HER2-	3.00477
647	A1NI	647	TCGA-E9-A1NI	1001	51	Stage IIA	Positive	Positive	Negative	ER+/HER2-	2.94194
648	A1OV	648	TCGA-EW-A1OV	1066	56	Stage IIB	Negative	Negative	Negative	ER-/HER2-	6.22443
649	A1OW	649	TCGA-EW-A1OW	1067	58	Stage IIA	Negative	Negative	Negative	ER-/HER2-	4.36514
650	A1OX	650	TCGA-EW-A1OX	1068	43	Stage IIA	Positive	Positive	Negative	ER+/HER2-	-2.71079
651	A1OY	651	TCGA-EW-A1OY	1069	63	Stage IIA	Positive	Positive	Negative	ER+/HER2-	2.67227
652	A1OZ	652	TCGA-EW-A1OZ	1070	56	Stage IIA	Positive	Negative	Positive	ER+/HER2+	3.50027
653	A1P0	653	TCGA-EW-A1P0	1071	55	Stage IIB	Positive	Negative	Negative	ER+/HER2-	3.1533
654	A1P1	654	TCGA-EW-A1P1	1072	68	Stage IIIC	Negative	Negative	Negative	ER-/HER2-	5.73554
655	A1P3	655	TCGA-EW-A1P3	1073	48	Stage IIA	Positive	Positive	Negative	ER+/HER2-	2.79972
656	A1P4	656	TCGA-EW-A1P4	1074	43	Stage IIA	Negative	Negative	Negative	ER-/HER2-	6.24269
657	A1P5	657	TCGA-EW-A1P5	1075	77	Stage IIB	Positive	Positive	Negative	ER+/HER2-	4.15242
658	A1P6	658	TCGA-EW-A1P6	1076	64	Stage IIB	Positive	Positive	Negative	ER+/HER2-	2.52047
659	A1P7	659	TCGA-EW-A1P7	1077	59	Stage IIA	Negative	Negative	Negative	ER-/HER2-	6.47495
660	A1P8	660	TCGA-EW-A1P8	1078	58	Stage IIIC	Negative	Negative	Negative	ER-/HER2-	3.59942
661	A1PA	661	TCGA-EW-A1PA	1079	59	Stage IIB	Positive	Positive	Negative	ER+/HER2-	3.51484
662	A1PB	662	TCGA-EW-A1PB	1080	70	Stage IIIA	Negative	Negative	Negative	ER-/HER2-	6.56409
663	A1PD	663	TCGA-EW-A1PD	1082	61	Stage IIA	Positive	Positive	Positive	ER+/HER2+	2.52269
664	A1PE	664	TCGA-EW-A1PE	1083	56	Stage IIA	Positive	Positive	Negative	ER+/HER2-	4.90181
665	A1PF	665	TCGA-EW-A1PF	1084	50	Stage IA	Positive	Positive	Negative	ER+/HER2-	4.01512
666	A1PG	666	TCGA-EW-A1PG	1085	53	Stage IIB	Positive	Positive	Negative	ER+/HER2-	3.2452
667	A1PH	667	TCGA-EW-A1PH	1086	52	Stage IIA	Negative	Negative	Negative	ER-/HER2-	4.26933
668	A1QZ	668	TCGA-E9-A1QZ	1002	61	Stage IIA	Positive	[Not Evaluated]	Negative	ER+/HER2-	5.11372
669	A1R0	669	TCGA-E9-A1R0	1003	58	Stage IIA	Positive	[Not Evaluated]	Negative	ER+/HER2-	3.97391
670	A1R2	670	TCGA-E9-A1R2	1004	51	Stage IIIC	Positive	Negative	Equivocal	Unclassified	4.04913
671	A1R3	671	TCGA-E9-A1R3	1005	70	Stage IIIC	Positive	[Not Evaluated]	Negative	ER+/HER2-	3.33377
672	A1R4	672	TCGA-E9-A1R4	1006	66	Stage IA	Positive	[Not Evaluated]	Negative	ER+/HER2-	4.97741
673	A1R5	673	TCGA-E9-A1R5	1007	63	Stage IA	Positive	[Not Evaluated]	[Not Evaluated]	Unclassified	2.27583
674	A1R6	674	TCGA-E9-A1R6	1008	63	Stage IIA	Positive	[Not Evaluated]	[Not Evaluated]	Unclassified	2.24428
675	A1R7	675	TCGA-E9-A1R7	1009	64	Stage IIA	Positive	[Not Evaluated]	Negative	ER+/HER2-	1.74556
676	A1RA	676	TCGA-E9-A1RA	1011	48	Stage IA	Positive	[Not Evaluated]	Negative	ER+/HER2-	4.67212
677	A1RB	677	TCGA-E9-A1RB	1013	40	Stage IIA	Positive	[Not Evaluated]	Negative	ER+/HER2-	2.93713
678	A1RC	678	TCGA-E9-A1RC	1014	56	Stage IIIC	Positive	[Not Evaluated]	Negative	ER+/HER2-	1.37208
679	A1RD	679	TCGA-E9-A1RD	1017	67	Stage IIA	Positive	[Not Evaluated]	Negative	ER+/HER2-	2.41647
680	A1RE	680	TCGA-E9-A1RE	1018	74	Stage IIIA	Positive	[Not Evaluated]	[Not Evaluated]	Unclassified	2.969
681	A1RF	681	TCGA-E9-A1RF	1019	68	Stage IIIA	Positive	[Not Evaluated]	Negative	ER+/HER2-	4.52379
682	A1RG	682	TCGA-E9-A1RG	1021	62	Stage IIIA	Positive	[Not Evaluated]	Negative	ER+/HER2-	3.02558
683	A1RH	683	TCGA-E9-A1RH	1023	63	Stage IIA	Negative	[Not Evaluated]	Negative	ER-/HER2-	3.20005
684	A1RI	684	TCGA-E9-A1RI	1025	43	Stage IIIA	Positive	[Not Evaluated]	[Not Evaluated]	Unclassified	3.33087
685	A1X5	685	TCGA-D8-A1X5	827	81	Stage IIIC	Positive	Positive	Positive	ER+/HER2+	3.256
686	A1X6	686	TCGA-D8-A1X6	828	80	Stage IIIA	Positive	Positive	Negative	ER+/HER2-	2.65995
687	A1X7	687	TCGA-D8-A1X7	829	40	Stage IIA	Positive	Positive	Negative	ER+/HER2-	3.39436
688	A1X8	688	TCGA-D8-A1X8	830	62	Stage IIIA	Positive	Indeterminate	Negative	ER+/HER2-	3.29355
689	A1X9	689	TCGA-D8-A1X9	831	66	Stage IIB	Positive	Positive	Indeterminate	Unclassified	4.03035
690	A1XA	690	TCGA-D8-A1XA	832	64	Stage IA	Positive	Positive	Negative	ER+/HER2-	2.73086
691	A1XB	691	TCGA-D8-A1XB	833	62	Stage IIB	Positive	Positive	Negative	ER+/HER2-	2.6445
692	A1XC	692	TCGA-D8-A1XC	834	85	Stage IIIB	Positive	Positive	Negative	ER+/HER2-	1.05108
693	A1XD	693	TCGA-D8-A1XD	835	36	Stage IIIA	Positive	Positive	Negative	ER+/HER2-	1.15605
694	A1XF	694	TCGA-D8-A1XF	836	45	Stage IIA	Positive	Positive	Negative	ER+/HER2-	2.76827
695	A1XG	695	TCGA-D8-A1XG	837	86	Stage IIIB	Positive	Negative	Negative	ER+/HER2-	0.575621
696	A1XJ	696	TCGA-D8-A1XJ	838	76	Stage IIIA	Positive	Positive	Positive	ER+/HER2+	1.7431
697	A1XK	697	TCGA-D8-A1XK	839	55	Stage IIB	Negative	Negative	Negative	ER-/HER2-	5.08141
698	A1XL	698	TCGA-D8-A1XL	840	34	Stage IIB	Positive	Positive	Equivocal	Unclassified	5.56303
699	A1XM	699	TCGA-D8-A1XM	841	57	Stage IA	Positive	Positive	Negative	ER+/HER2-	4.61401
700	A1XO	700	TCGA-D8-A1XO	842	56	Stage IIB	Positive	Positive	Negative	ER+/HER2-	3.06029
701	A1XQ	701	TCGA-D8-A1XQ	843	69	Stage IIA	Negative	Negative	Negative	ER-/HER2-	5.23613
702	A1XR	702	TCGA-D8-A1XR	844	56	Stage IIB	Positive	Positive	Negative	ER+/HER2-	1.82595
703	A1XS	703	TCGA-D8-A1XS	845	48	Stage IIIC	Positive	Positive	Positive	ER+/HER2+	3.39826
704	A1XT	704	TCGA-D8-A1XT	846	61	Stage IIA	Negative	Negative	Positive	ER-/HER2+	4.32857
705	A1XU	705	TCGA-D8-A1XU	847	56	Stage IA	Positive	Positive	Negative	ER+/HER2-	1.99645
706	A1XV	706	TCGA-D8-A1XV	848	84	Stage IIA	Positive	Positive	Negative	ER+/HER2-	0.143479
707	A1XW	707	TCGA-D8-A1XW	849	53	Stage IIA	Negative	Positive	Negative	ER-/HER2-	3.81124
708	A1XY	708	TCGA-D8-A1XY	850	74	Stage IIA	Positive	Positive	Positive	ER+/HER2+	2.73185
709	A1XZ	709	TCGA-D8-A1XZ	851	81	Stage IIIA	Positive	Negative	Negative	ER+/HER2-	3.62936
710	A1Y0	710	TCGA-D8-A1Y0	852	65	Stage IIIA	Positive	Positive	Negative	ER+/HER2-	5.03963
711	A1Y1	711	TCGA-D8-A1Y1	853	80	Stage IIIA	Positive	Positive	Negative	ER+/HER2-	3.79179
712	A1Y2	712	TCGA-D8-A1Y2	854	71	Stage IIA	Positive	Positive	Negative	ER+/HER2-	4.53987
713	A1Y3	713	TCGA-D8-A1Y3	855	61	Stage IIIA	Positive	Positive	Negative	ER+/HER2-	3.54269
714	A201	714	TCGA-BH-A201	726	64	Stage IA	Positive	Positive	Negative	ER+/HER2-	3.44271
715	A202	715	TCGA-BH-A202	727	60	Stage II	Positive	Positive	Positive	ER+/HER2+	4.80372
716	A203	716	TCGA-BH-A203	729	78	Stage IIB	Negative	[Not Evaluated]	Negative	ER-/HER2-	4.17137
717	A204	717	TCGA-BH-A204	730	80	Stage IIB	Positive	[Not Evaluated]	Negative	ER+/HER2-	0.62765
718	A208	718	TCGA-BH-A208	733	48	Stage IIB	Negative	[Not Evaluated]	Negative	ER-/HER2-	2.76385
719	A209	719	TCGA-BH-A209	734	77	Stage I	Positive	Positive	Negative	ER+/HER2-	6.3751
720	A226	720	TCGA-E9-A226	1026	45	Stage IIIA	Positive	[Not Evaluated]	Negative	ER+/HER2-	-0.918494
721	A227	721	TCGA-E9-A227	1027	42	Stage IIB	Positive	Positive	Negative	ER+/HER2-	5.06623
722	A228	722	TCGA-E9-A228	1028	58	Stage IIB	Positive	[Not Evaluated]	Positive	ER+/HER2+	1.55404
723	A229	723	TCGA-E9-A229	1029	37	Stage IA	Positive	[Not Evaluated]	Negative	ER+/HER2-	3.82612
724	A22A	724	TCGA-E9-A22A	1030	74	Stage IIA	Positive	Negative	Negative	ER+/HER2-	4.61658
725	A22B	725	TCGA-E9-A22B	1031	71	Stage IA	Positive	Negative	Negative	ER+/HER2-	2.95102
726	A22D	726	TCGA-E9-A22D	1032	38	Stage IIA	Positive	Positive	Positive	ER+/HER2+	7.17876
727	A22E	727	TCGA-E9-A22E	1033	56	Stage IIIA	Positive	Positive	Positive	ER+/HER2+	3.82654
728	A22G	728	TCGA-E9-A22G	1034	47	Stage IIA	Negative	Negative	Positive	ER-/HER2+	3.3629
729	A22H	729	TCGA-E9-A22H	1035	42	Stage IIB	Positive	Positive	Positive	ER+/HER2+	3.70699
730	A23C	730	TCGA-AC-A23C	259	62	Stage IIB	Positive	Positive	Positive	ER+/HER2+	4.07445
731	A23E	731	TCGA-AC-A23E	260	50	Stage IIB	Positive	Positive	Negative	ER+/HER2-	3.33519
732	A23G	732	TCGA-AC-A23G	261	76	Stage IIA	Positive	Positive	Positive	ER+/HER2+	3.50004
733	A23H	733	TCGA-AC-A23H	262	90	Stage IIA	Positive	Negative	Positive	ER+/HER2+	2.24644
734	A243	734	TCGA-E9-A243	1036	52	Stage IIA	Negative	[Not Evaluated]	Negative	ER-/HER2-	6.29205
735	A244	735	TCGA-E9-A244	1037	54	Stage IIA	Negative	[Not Evaluated]	Negative	ER-/HER2-	2.68047
736	A245	736	TCGA-E9-A245	1038	47	Stage IIB	Positive	[Not Evaluated]	Negative	ER+/HER2-	2.27315
737	A247	737	TCGA-E9-A247	1039	59	Stage IA	Positive	[Not Evaluated]	Negative	ER+/HER2-	2.01912
738	A248	738	TCGA-E9-A248	1040	51	Stage IIA	Negative	[Not Evaluated]	Negative	ER-/HER2-	6.06458
739	A249	739	TCGA-E9-A249	1041	45	Stage IIA	Positive	[Not Evaluated]	Negative	ER+/HER2-	4.12034
740	A24A	740	TCGA-E9-A24A	1042	69	Stage IIA	Positive	[Not Evaluated]	Negative	ER+/HER2-	3.20911
741	A24H	741	TCGA-AR-A24H	431	65	Stage IIA	Positive	Positive	Negative	ER+/HER2-	4.3499
742	A24K	742	TCGA-AR-A24K	432	46	Stage IIA	Positive	Positive	Negative	ER+/HER2-	1.41735
743	A24L	743	TCGA-AR-A24L	433	26	Stage IIB	Positive	Positive	Negative	ER+/HER2-	2.3548
744	A24M	744	TCGA-AR-A24M	434	38	Stage IIIA	Positive	Positive	Negative	ER+/HER2-	2.42899
745	A24N	745	TCGA-AR-A24N	435	54	Stage I	Positive	Positive	Negative	ER+/HER2-	3.26356
746	A24O	746	TCGA-AR-A24O	436	43	Stage IIIA	Positive	Positive	Negative	ER+/HER2-	4.06957
747	A24P	747	TCGA-AR-A24P	437	47	Stage I	Positive	Positive	Equivocal	Unclassified	3.33173
748	A24Q	748	TCGA-AR-A24Q	438	49	Stage IIB	Positive	Negative	Negative	ER+/HER2-	4.2568
749	A24R	749	TCGA-AR-A24R	439	45	Stage IIIA	Positive	Positive	Negative	ER+/HER2-	4.2835
750	A24S	750	TCGA-AR-A24S	440	61	Stage I	Positive	Positive	Negative	ER+/HER2-	4.1972
751	A24T	751	TCGA-AR-A24T	441	46	Stage IIIC	Positive	Positive	Negative	ER+/HER2-	3.20258
752	A24U	752	TCGA-AR-A24U	442	47	Stage IIA	Negative	Negative	Positive	ER-/HER2+	5.33196
753	A24V	753	TCGA-AR-A24V	443	52	Stage IIB	Positive	Positive	Negative	ER+/HER2-	3.12426
754	A24W	754	TCGA-AR-A24W	444	55	Stage IIB	Positive	Positive	Negative	ER+/HER2-	2.70121
755	A24X	755	TCGA-AR-A24X	445	52	Stage IIA	Positive	Positive	Negative	ER+/HER2-	4.62902
756	A24Z	756	TCGA-AR-A24Z	446	57	Stage IIA	Positive	Positive	Negative	ER+/HER2-	2.61725
757	A250	757	TCGA-AR-A250	447	58	Stage IIA	Positive	Negative	Positive	ER+/HER2+	3.86883
758	A251	758	TCGA-AR-A251	448	51	Stage IIIA	Positive	Negative	Negative	ER+/HER2-	3.92609
759	A252	759	TCGA-AR-A252	449	50	Stage I	Positive	Positive	Negative	ER+/HER2-	6.09244
760	A254	760	TCGA-AR-A254	450	50	Stage IIIA	Positive	Positive	Positive	ER+/HER2+	4.90341
761	A255	761	TCGA-AR-A255	451	62	Stage I	Positive	Positive	Positive	ER+/HER2+	4.30956
762	A256	762	TCGA-AR-A256	452	45	Stage IIA	Negative	Negative	Negative	ER-/HER2-	3.07502
763	A259	763	TCGA-A2-A259	100	70	Stage I	Positive	Positive	Negative	ER+/HER2-	4.76821
764	A25A	764	TCGA-A2-A25A	101	44	Stage IIA	Positive	Positive	Negative	ER+/HER2-	4.06565
765	A25B	765	TCGA-A2-A25B	102	39	Stage IIB	Positive	Positive	Negative	ER+/HER2-	3.59341
766	A25C	766	TCGA-A2-A25C	103	50	Stage IIB	Positive	Positive	Negative	ER+/HER2-	3.63558
767	A25D	767	TCGA-A2-A25D	104	90	Stage IIIC	Positive	Negative	Negative	ER+/HER2-	5.09409
768	A25E	768	TCGA-A2-A25E	105	34	Stage IIIA	Positive	Positive	Negative	ER+/HER2-	3.45011
769	A25F	769	TCGA-A2-A25F	106	66	Stage IIA	Negative	Positive	Negative	ER-/HER2-	7.26162
770	A26E	770	TCGA-A7-A26E	147	71	Stage IIIA	Positive	Positive	Negative	ER+/HER2-	2.58447
771	A26F	771	TCGA-A7-A26F	148	55	Stage IA	Negative	Negative	Negative	ER-/HER2-	4.92813
772	A26G	772	TCGA-A7-A26G	149	50	Stage IIA	Negative	Negative	Negative	ER-/HER2-	4.35153
773	A26H	773	TCGA-A7-A26H	150	72	Stage IIA	Positive	Negative	Equivocal	Unclassified	3.62345
774	A26I	774	TCGA-A7-A26I	151	65	Stage IIA	Negative	Negative	Negative	ER-/HER2-	1.95975
775	A26J	775	TCGA-A7-A26J	152	49	Stage IIA	Positive	Positive	Negative	ER+/HER2-	3.20808
776	A26V	776	TCGA-C8-A26V	782	47	Stage IIIA	Positive	Positive	Negative	ER+/HER2-	3.97185
777	A26W	777	TCGA-C8-A26W	783	58	Stage IIB	Positive	Positive	Positive	ER+/HER2+	4.20077
778	A26X	778	TCGA-C8-A26X	784	58	Stage IIA	Negative	Negative	Negative	ER-/HER2-	5.92454
779	A26Y	779	TCGA-C8-A26Y	785	90	Stage IIA	Negative	Negative	Negative	ER-/HER2-	4.26157
780	A26Z	780	TCGA-C8-A26Z	786	59	Stage IIA	Positive	Positive	Negative	ER+/HER2-	1.976
781	A273	781	TCGA-C8-A273	787	29	Stage IIB	Positive	Positive	Negative	ER+/HER2-	2.74728
782	A274	782	TCGA-C8-A274	788	63	Stage IIA	Positive	Positive	Negative	ER+/HER2-	2.46342
783	A275	783	TCGA-C8-A275	789	56	Stage IIA	Negative	[Not Evaluated]	Positive	ER-/HER2+	5.58439
784	A278	784	TCGA-C8-A278	790	61	Stage IIIA	Negative	Negative	Positive	ER-/HER2+	5.37689
785	A27A	785	TCGA-C8-A27A	791	48	Stage IIB	Positive	Positive	Negative	ER+/HER2-	2.69839
786	A27B	786	TCGA-C8-A27B	792	48	Stage IIB	Negative	Negative	Negative	ER-/HER2-	5.4929
787	A27E	787	TCGA-D8-A27E	856	66	Stage IA	Positive	Positive	Negative	ER+/HER2-	3.00057
788	A27F	788	TCGA-D8-A27F	857	40	Stage IIA	Negative	Negative	Negative	ER-/HER2-	3.8215
789	A27G	789	TCGA-D8-A27G	858	75	Stage IIA	Positive	Positive	Positive	ER+/HER2+	4.14139
790	A27H	790	TCGA-D8-A27H	859	72	Stage IIA	Negative	Negative	Negative	ER-/HER2-	2.65342
791	A27I	791	TCGA-D8-A27I	860	58	Stage IIIA	Positive	Positive	Negative	ER+/HER2-	4.36421
792	A27K	792	TCGA-D8-A27K	861	47	Stage IIB	Positive	Positive	Negative	ER+/HER2-	4.28883
793	A27L	793	TCGA-D8-A27L	862	49	Stage IIIA	Positive	Positive	Negative	ER+/HER2-	4.30967
794	A27M	794	TCGA-D8-A27M	863	59	Stage IA	Negative	Negative	Negative	ER-/HER2-	6.33896
795	A27N	795	TCGA-D8-A27N	864	36	Stage IIIA	Positive	Positive	Positive	ER+/HER2+	3.12522
796	A27P	796	TCGA-D8-A27P	865	64	Stage IA	Positive	Positive	Negative	ER+/HER2-	2.80985
797	A27R	797	TCGA-D8-A27R	866	41	Stage IIIC	Positive	Positive	Negative	ER+/HER2-	3.69396
798	A27T	798	TCGA-D8-A27T	867	53	Stage IIIC	Positive	Positive	Negative	ER+/HER2-	4.21861
799	A27V	799	TCGA-D8-A27V	868	62	Stage IIA	Positive	Positive	Negative	ER+/HER2-	3.37669
800	A27W	800	TCGA-D8-A27W	869	55	Stage IIIB	Positive	Positive	Negative	ER+/HER2-	3.70959
801	A28O	801	TCGA-BH-A28O	736	50	Stage IIIC	Positive	Positive	Negative	ER+/HER2-	3.49371
802	A28Q	802	TCGA-BH-A28Q	737	46	Stage IIB	Positive	Positive	Negative	ER+/HER2-	4.16347
803	A295	803	TCGA-E9-A295	1043	71	Stage IIA	Positive	Positive	Positive	ER+/HER2+	3.16247
804	A2B8	804	TCGA-AC-A2B8	264	84	Stage IIB	Positive	Positive	Negative	ER+/HER2-	3.73086
805	A2BK	805	TCGA-AC-A2BK	265	78	Stage IIIA	Negative	Negative	Negative	ER-/HER2-	2.36439
806	A2BM	806	TCGA-AC-A2BM	266	41	Stage IIB	Positive	Positive	Negative	ER+/HER2-	3.63663
807	A2C8	807	TCGA-GI-A2C8	1095	63	Stage IIIB	Positive	Positive	Negative	ER+/HER2-	3.74872
808	A2C9	808	TCGA-GI-A2C9	1097	58	Stage IIB	Negative	Negative	Negative	ER-/HER2-	3.63774
809	A2D9	809	TCGA-GM-A2D9	1099	69	Stage I	Positive	Positive	Negative	ER+/HER2-	2.63888
810	A2DA	810	TCGA-GM-A2DA	1100	46	Stage IIB	Positive	Positive	Positive	ER+/HER2+	3.54667
811	A2DB	811	TCGA-GM-A2DB	1101	62	Stage IIA	Negative	Negative	Negative	ER-/HER2-	4.48412
812	A2DC	812	TCGA-GM-A2DC	1102	57	Stage IIA	Positive	Positive	[Not Evaluated]	Unclassified	2.52129
813	A2DD	813	TCGA-GM-A2DD	1103	53	Stage I	Negative	Negative	Negative	ER-/HER2-	6.07941
814	A2DF	814	TCGA-GM-A2DF	1104	53	Stage IIA	Negative	Negative	Negative	ER-/HER2-	4.21508
815	A2DH	815	TCGA-GM-A2DH	1105	58	Stage I	Negative	Negative	Negative	ER-/HER2-	5.81941
816	A2DI	816	TCGA-GM-A2DI	1106	52	Stage I	Negative	Negative	Negative	ER-/HER2-	6.70868
817	A2DK	817	TCGA-GM-A2DK	1107	58	Stage I	Positive	Negative	Negative	ER+/HER2-	3.81587
818	A2DL	818	TCGA-GM-A2DL	1108	50	Stage I	Positive	Positive	Negative	ER+/HER2-	2.9628
819	A2DM	819	TCGA-GM-A2DM	1109	57	Stage IIA	Positive	Positive	Negative	ER+/HER2-	2.40081
820	A2DN	820	TCGA-GM-A2DN	1110	58	Stage IIA	Positive	Positive	Negative	ER+/HER2-	5.65525
821	A2DO	821	TCGA-GM-A2DO	1111	54	Stage I	Positive	Positive	Negative	ER+/HER2-	6.5667
822	A2FB	822	TCGA-AC-A2FB	268	65	Stage IIA	Positive	Positive	Positive	ER+/HER2+	5.98628
823	A2FF	823	TCGA-AC-A2FF	270	40	Stage IIB	Positive	Positive	Negative	ER+/HER2-	5.1412
824	A2FG	824	TCGA-AC-A2FG	271	79	Stage IIB	Positive	Negative	Negative	ER+/HER2-	2.88307
825	A2FK	825	TCGA-AC-A2FK	272	45	Stage IIIC	Positive	Positive	[Not Evaluated]	Unclassified	4.83325
826	A2FM	826	TCGA-AC-A2FM	273	87	Stage IIB	Positive	[Not Evaluated]	Positive	ER+/HER2+	2.39824
827	A2FO	827	TCGA-AC-A2FO	275	65	Stage IIB	Positive	Negative	Negative	ER+/HER2-	5.14881
828	A2FR	828	TCGA-EW-A2FR	1087	59	Stage IIIC	Negative	Negative	Positive	ER-/HER2+	3.31485
829	A2FS	829	TCGA-EW-A2FS	1088	41	Stage IIB	Positive	Negative	Negative	ER+/HER2-	3.67029
830	A2FV	830	TCGA-EW-A2FV	1089	39	Stage IIIC	Positive	Positive	Negative	ER+/HER2-	4.69833
831	A2FW	831	TCGA-EW-A2FW	1090	52	Stage IIA	Positive	Positive	Negative	ER+/HER2-	1.99918
832	A2IU	832	TCGA-B6-A2IU	516	62	Stage IIA	Positive	Positive	[Not Evaluated]	Unclassified	1.74404
833	A2JS	833	TCGA-E9-A2JS	1044	72	Stage IIB	Positive	[Not Evaluated]	Negative	ER+/HER2-	2.63121
834	A2JT	834	TCGA-E9-A2JT	1045	63	Stage IIA	Positive	[Not Evaluated]	Negative	ER+/HER2-	7.06996
835	A2KD	835	TCGA-A7-A2KD	153	53	Stage IIIA	Positive	Positive	Positive	ER+/HER2+	4.43442
836	A2L8	836	TCGA-BH-A2L8	738	45	Stage IIA	Positive	Positive	Negative	ER+/HER2-	6.09646
837	A2LE	837	TCGA-AR-A2LE	453	69	Stage I	Positive	Negative	Negative	ER+/HER2-	2.32828
838	A2LH	838	TCGA-AR-A2LH	454	55	Stage III	Negative	Negative	Negative	ER-/HER2-	5.54957
839	A2LJ	839	TCGA-AR-A2LJ	455	40	Stage IIIA	Positive	Positive	Positive	ER+/HER2+	3.53554
840	A2LK	840	TCGA-AR-A2LK	456	62	Stage III	Positive	Positive	Negative	ER+/HER2-	2.16664
841	A2LL	841	TCGA-AR-A2LL	457	70	Stage IIB	Positive	Positive	Positive	ER+/HER2+	2.8184
842	A2LM	842	TCGA-AR-A2LM	458	49	Stage II	Positive	Positive	[Not Evaluated]	Unclassified	3.75246
843	A2LN	843	TCGA-AR-A2LN	459	65	Stage IIA	Positive	Positive	Negative	ER+/HER2-	4.2087
844	A2LO	844	TCGA-AR-A2LO	460	46	Stage IIB	Positive	Positive	Negative	ER+/HER2-	4.95583
845	A2LQ	845	TCGA-AR-A2LQ	461	59	Stage IIB	Positive	Positive	Negative	ER+/HER2-	3.20227
846	A2LR	846	TCGA-AR-A2LR	462	49	Stage I	Negative	Negative	Negative	ER-/HER2-	3.3024
847	A2NL	847	TCGA-HN-A2NL	1120	56	Stage IIA	Negative	Negative	Negative	ER-/HER2-	4.06814
848	A2OB	848	TCGA-HN-A2OB	1121	45	Stage IIB	Positive	Positive	Negative	ER+/HER2-	4.14182
849	A2P5	849	TCGA-E2-A2P5	970	78	Stage IIIC	Positive	Positive	Negative	ER+/HER2-	3.08393
850	A2P6	850	TCGA-E2-A2P6	971	77	Stage IIB	Positive	Positive	Negative	ER+/HER2-	2.19609
851	A2QH	851	TCGA-AC-A2QH	276	58	Stage IIB	Negative	Negative	Negative	ER-/HER2-	2.01604
852	A2QI	852	TCGA-AC-A2QI	277	76	Stage IIIA	Positive	Negative	Negative	ER+/HER2-	4.25609
853	A2QJ	853	TCGA-AC-A2QJ	278	48	Stage IIIB	Negative	Negative	Negative	ER-/HER2-	3.46208
854	A3BB	854	TCGA-AC-A3BB	279	46	Stage IIIA	Positive	Positive	Negative	ER+/HER2-	5.15562
855	A3DX	855	TCGA-E2-A3DX	972	43	Stage IIIC	Positive	Positive	Positive	ER+/HER2+	5.44871
856	A3HN	856	TCGA-AC-A3HN	280	87	Stage IIB	Positive	Positive	Negative	ER+/HER2-	4.44934
857	A3HO	857	TCGA-E9-A3HO	1046	49	Stage IIA	Positive	[Not Evaluated]	Negative	ER+/HER2-	3.49632
858	A3IY	858	TCGA-A7-A3IY	154	71	Stage I	Positive	Positive	Negative	ER+/HER2-	3.04967
859	A3IZ	859	TCGA-A7-A3IZ	155	62	Stage IIA	Positive	Negative	Equivocal	Unclassified	1.42895
860	A3J0	860	TCGA-A7-A3J0	156	62	Stage IIA	Positive	Positive	Negative	ER+/HER2-	4.38369
861	A3J1	861	TCGA-A7-A3J1	157	63	Stage IA	Positive	Positive	Negative	ER+/HER2-	5.14518
862	A3KC	862	TCGA-A2-A3KC	107	55	Stage IIB	Positive	Positive	Equivocal	Unclassified	3.27064
863	A3KD	863	TCGA-A2-A3KD	108	47	Stage IIIA	Positive	Positive	Negative	ER+/HER2-	2.72816
864	A3M7	864	TCGA-C8-A3M7	793	60	Stage IIIB	Negative	Negative	Negative	ER-/HER2-	3.43046
865	A3M8	865	TCGA-C8-A3M8	794	68	Stage IA	Positive	Positive	Positive	ER+/HER2+	1.76177
866	A3NW	866	TCGA-GM-A3NW	1112	63	Stage IIA	Negative	Positive	Negative	ER-/HER2-	3.53401
867	A3NY	867	TCGA-GM-A3NY	1113	72	Stage IIB	Positive	Positive	Negative	ER+/HER2-	2.62209
868	A3OD	868	TCGA-AC-A3OD	281	68	Stage IIB	Positive	Positive	Negative	ER+/HER2-	4.77706
869	A3Q9	869	TCGA-E9-A3Q9	1047	78	Stage IIIC	Positive	Positive	Negative	ER+/HER2-	2.43945
870	A3QA	870	TCGA-E9-A3QA	1048	33	Stage IIA	Negative	[Not Evaluated]	Negative	ER-/HER2-	6.32987
871	A3QP	871	TCGA-AC-A3QP	282	79	Stage IIB	Positive	Positive	Negative	ER+/HER2-	4.10657
872	A3RF	872	TCGA-A7-A3RF	158	79	Stage IIA	Positive	Positive	Negative	ER+/HER2-	0.978131
873	A3TN	873	TCGA-AC-A3TN	283	75	Stage IIB	Positive	Positive	Positive	ER+/HER2+	1.82712
874	A3U0	874	TCGA-EW-A3U0	1092	61	Stage IIIA	Negative	Negative	Negative	ER-/HER2-	6.49419
875	A3W5	875	TCGA-AC-A3W5	284	65	Stage IIA	Positive	Positive	Positive	ER+/HER2+	4.57839
876	A3W6	876	TCGA-AC-A3W6	285	90	Stage IIIA	Positive	Positive	Negative	ER+/HER2-	4.17744
877	A3X8	877	TCGA-E9-A3X8	1049	48	Stage IIB	Positive	Positive	Positive	ER+/HER2+	3.31251
878	A3XG	878	TCGA-GM-A3XG	1114	46	Stage IIIA	Positive	Positive	Negative	ER+/HER2-	2.7898
879	A3XL	879	TCGA-GM-A3XL	1115	49	Stage IIA	Negative	Negative	Negative	ER-/HER2-	5.62274
880	A3XN	880	TCGA-GM-A3XN	1116	44	Stage IIIA	Positive	Positive	Negative	ER+/HER2-	3.84994
881	A3XS	881	TCGA-A2-A3XS	109	62	Stage IIIA	Negative	Negative	Negative	ER-/HER2-	3.82558
882	A3XT	882	TCGA-A2-A3XT	110	45	Stage IIB	Negative	Negative	Negative	ER-/HER2-	4.0908
883	A3XU	883	TCGA-A2-A3XU	111	35	Stage IIB	Negative	Negative	Negative	ER-/HER2-	-0.200608
884	A3XV	884	TCGA-A2-A3XV	112	46	Stage IIA	Positive	Negative	Positive	ER+/HER2+	1.11461
885	A3XW	885	TCGA-A2-A3XW	113	42	Stage IIB	Positive	Negative	Negative	ER+/HER2-	3.25607
886	A3XX	886	TCGA-A2-A3XX	114	49	Stage IIA	Negative	Negative	Negative	ER-/HER2-	4.51608
887	A3XY	887	TCGA-A2-A3XY	115	49	Stage IIB	Negative	Negative	Negative	ER-/HER2-	5.10371
888	A3XZ	888	TCGA-A2-A3XZ	116	46	Stage I	Negative	Negative	Positive	ER-/HER2+	5.26478
889	A3Y0	889	TCGA-A2-A3Y0	117	57	Stage IIB	Positive	Negative	Negative	ER+/HER2-	5.49438
890	A3YI	890	TCGA-AC-A3YI	286	74	Stage IIIC	Positive	Positive	Positive	ER+/HER2+	3.86303
891	A3YJ	891	TCGA-AC-A3YJ	287	66	Stage IIA	Positive	Positive	Negative	ER+/HER2-	2.89794
892	A3YW	892	TCGA-JL-A3YW	1122	49	Stage IIB	Positive	Positive	Positive	ER+/HER2+	4.55555
893	A3YX	893	TCGA-JL-A3YX	1123	46	Stage IIA	Positive	Positive	Positive	ER+/HER2+	2.25647
894	A3Z5	894	TCGA-D8-A3Z5	870	54	Stage IIIC	Positive	Positive	Negative	ER+/HER2-	2.61181
895	A3Z6	895	TCGA-D8-A3Z6	871	56	Stage IIIC	Positive	Positive	Negative	ER+/HER2-	1.98832
896	A400	896	TCGA-B6-A400	517	43	Stage IIIA	Negative	Negative	Negative	ER-/HER2-	3.55781
897	A401	897	TCGA-B6-A401	518	47	Stage IIA	Positive	Positive	Negative	ER+/HER2-	4.63602
898	A402	898	TCGA-B6-A402	519	47	Stage I	Negative	Negative	Negative	ER-/HER2-	1.51254
899	A408	899	TCGA-B6-A408	520	55	Stage IIIC	Positive	Positive	Negative	ER+/HER2-	4.33279
900	A40B	900	TCGA-B6-A40B	521	76	Stage I	Positive	Positive	Negative	ER+/HER2-	2.8022
901	A40C	901	TCGA-B6-A40C	522	51	Stage IIB	Positive	Positive	Negative	ER+/HER2-	3.12782
902	A423	902	TCGA-EW-A423	1093	75	Stage IIA	Positive	Positive	Negative	ER+/HER2-	3.16259
903	A424	903	TCGA-EW-A424	1094	51	Stage IIIA	Positive	Positive	Positive	ER+/HER2+	1.24406
904	A425	904	TCGA-A7-A425	159	70	Stage IIIC	Positive	Positive	Negative	ER+/HER2-	2.89682
905	A426	905	TCGA-A7-A426	160	50	Stage IIIC	Positive	Positive	Negative	ER+/HER2-	3.70863
906	A42T	906	TCGA-BH-A42T	739	75	Stage IIA	Positive	Positive	Positive	ER+/HER2+	2.51015
907	A42U	907	TCGA-BH-A42U	740	80	Stage IA	Negative	Negative	Negative	ER-/HER2-	4.22734
908	A42V	908	TCGA-BH-A42V	741	41	Stage IB	Positive	Positive	Negative	ER+/HER2-	3.86945
909	A440	909	TCGA-LL-A440	1129	61	Stage IA	Positive	Positive	Negative	ER+/HER2-	4.13218
910	A441	910	TCGA-LL-A441	1130	62	Stage IA	Negative	Negative	Negative	ER-/HER2-	6.17719
911	A442	911	TCGA-LL-A442	1131	56	Stage IIA	Positive	Positive	Negative	ER+/HER2-	1.95166
912	A4E0	912	TCGA-GM-A4E0	1117	67	Stage IIIC	Positive	Positive	Negative	ER+/HER2-	4.152
913	A4E4	913	TCGA-LQ-A4E4	1148	73	Stage IIIA	Positive	Positive	Negative	ER+/HER2-	1.30766
914	A4RW	914	TCGA-A2-A4RW	118	49	Stage IIIC	Positive	Positive	Negative	ER+/HER2-	4.10833
915	A4RX	915	TCGA-A2-A4RX	119	67	Stage IIA	Positive	Positive	Negative	ER+/HER2-	4.60141
916	A4RY	916	TCGA-A2-A4RY	120	46	Stage IIIC	Positive	Positive	Negative	ER+/HER2-	5.062
917	A4S0	917	TCGA-A2-A4S0	121	77	Stage IIA	Positive	Positive	Negative	ER+/HER2-	1.95468
918	A4S1	918	TCGA-A2-A4S1	122	66	Stage IIA	Positive	Negative	Negative	ER+/HER2-	2.54009
919	A4S2	919	TCGA-A2-A4S2	123	62	Stage IIIA	Positive	Positive	Negative	ER+/HER2-	5.152
920	A4S3	920	TCGA-A2-A4S3	124	59	Stage IIB	Positive	Positive	Negative	ER+/HER2-	4.6312
921	A4SA	921	TCGA-A7-A4SA	161	40	Stage IIB	Positive	Negative	Negative	ER+/HER2-	4.42425
922	A4SB	922	TCGA-A7-A4SB	162	56	Stage IIIA	Positive	Positive	Negative	ER+/HER2-	1.40652
923	A4SC	923	TCGA-A7-A4SC	163	62	Stage IIB	Positive	Negative	Positive	ER+/HER2+	3.47263
924	A4SD	924	TCGA-A7-A4SD	164	52	Stage IIA	Negative	Negative	Negative	ER-/HER2-	5.81828
925	A4SE	925	TCGA-A7-A4SE	165	54	Stage IIA	Negative	Negative	Negative	ER-/HER2-	3.67136
926	A4SF	926	TCGA-A7-A4SF	166	54	Stage IIA	Positive	Negative	Positive	ER+/HER2+	3.97237
927	A4Z1	927	TCGA-D8-A4Z1	872	68	Stage IA	Positive	Positive	Negative	ER+/HER2-	4.34292
928	A50Y	928	TCGA-LL-A50Y	1132	84	Stage IIA	Positive	Positive	Equivocal	Unclassified	3.28044
929	A51U	929	TCGA-MS-A51U	1149	44	Stage IIB	Positive	Positive	Negative	ER+/HER2-	3.49046
930	A54N	930	TCGA-AQ-A54N	395	51	Stage IIA	Negative	Negative	Negative	ER-/HER2-	2.15884
931	A54O	931	TCGA-AQ-A54O	396	51	Stage IIA	Positive	Positive	Negative	ER+/HER2-	3.42608
932	A54X	932	TCGA-E9-A54X	1050	85	Stage IA	Positive	Positive	Negative	ER+/HER2-	0.683408
933	A54Y	933	TCGA-E9-A54Y	1051	63	Stage IIIA	Positive	Positive	Negative	ER+/HER2-	0.563306
934	A56D	934	TCGA-A7-A56D	167	84	Stage IIA	Positive	Positive	Negative	ER+/HER2-	2.3393
935	A56Z	935	TCGA-E2-A56Z	973	69	Stage IIB	Positive	Positive	Negative	ER+/HER2-	2.56241
936	A570	936	TCGA-E2-A570	974	47	Stage IB	Positive	Positive	Negative	ER+/HER2-	2.06253
937	A572	937	TCGA-E2-A572	975	72	Stage IIIA	Positive	Positive	Negative	ER+/HER2-	0.974394
938	A573	938	TCGA-E2-A573	976	48	Stage IA	Negative	Negative	Negative	ER-/HER2-	5.85928
939	A574	939	TCGA-E2-A574	977	44	Stage IIA	Negative	Negative	Negative	ER-/HER2-	-0.192581
940	A576	940	TCGA-E2-A576	978	69	Stage IA	Positive	Positive	Negative	ER+/HER2-	2.12956
941	A5D6	941	TCGA-OL-A5D6	1151	71	Stage IIA	Negative	Negative	[Not Evaluated]	Unclassified	2.83798
942	A5D7	942	TCGA-OL-A5D7	1152	70	Stage IIA	Negative	Negative	Negative	ER-/HER2-	5.57274
943	A5D8	943	TCGA-OL-A5D8	1153	40	Stage IIB	Positive	Positive	Negative	ER+/HER2-	3.65843
944	A5DA	944	TCGA-OL-A5DA	1154	61	Stage IIA	Positive	Positive	[Not Evaluated]	Unclassified	3.84597
945	A5DC	945	TCGA-PE-A5DC	1174	72	Stage IIIA	Positive	Positive	Positive	ER+/HER2+	2.61312
946	A5DD	946	TCGA-PE-A5DD	1175	64	Stage IIA	Positive	Negative	Positive	ER+/HER2+	3.60341
947	A5DE	947	TCGA-PE-A5DE	1176	41	Stage IIA	Positive	Positive	Negative	ER+/HER2-	6.42759
948	A5FK	948	TCGA-E9-A5FK	1052	60	Stage IIIC	Positive	Positive	Negative	ER+/HER2-	5.66289
949	A5FL	949	TCGA-E9-A5FL	1053	65	Stage IIB	Negative	Negative	Negative	ER-/HER2-	2.38382
950	A5IZ	950	TCGA-BH-A5IZ	742	51	Stage IIB	Positive	Negative	Negative	ER+/HER2-	2.80648
951	A5J0	951	TCGA-BH-A5J0	743	63	Stage IA	Positive	Positive	Negative	ER+/HER2-	4.36767
952	A5PV	952	TCGA-GM-A5PV	1118	63	Stage IIB	Positive	Positive	Negative	ER+/HER2-	2.85817
953	A5PX	953	TCGA-GM-A5PX	1119	65	Stage IIB	Positive	Positive	Negative	ER+/HER2-	2.65525
954	A5Q2	954	TCGA-OK-A5Q2	1150	59	Stage II	Positive	Positive	Negative	ER+/HER2-	4.83793
955	A5QM	955	TCGA-AR-A5QM	463	62	Stage IIA	Positive	Positive	Negative	ER+/HER2-	3.16349
956	A5QN	956	TCGA-AR-A5QN	464	68	Stage IIIC	Positive	Positive	Positive	ER+/HER2+	3.51883
957	A5QP	957	TCGA-AR-A5QP	465	54	Stage IIB	Positive	Positive	Negative	ER+/HER2-	3.25815
958	A5QQ	958	TCGA-AR-A5QQ	466	68	Stage IIIA	Negative	Negative	Negative	ER-/HER2-	5.66212
959	A5RU	959	TCGA-OL-A5RU	1155	63	Stage IIA	Positive	Positive	[Not Evaluated]	Unclassified	5.0344
960	A5RV	960	TCGA-OL-A5RV	1156	43	Stage IIIC	Positive	Positive	[Not Evaluated]	Unclassified	3.91724
961	A5RW	961	TCGA-OL-A5RW	1157	40	Stage IIA	Negative	Negative	Negative	ER-/HER2-	3.43532
962	A5RX	962	TCGA-OL-A5RX	1158	51	Stage IA	Positive	Positive	[Not Evaluated]	Unclassified	3.83796
963	A5RY	963	TCGA-OL-A5RY	1159	52	Stage IIA	Positive	Negative	Positive	ER+/HER2+	5.76492
964	A5RZ	964	TCGA-OL-A5RZ	1160	57	Stage IA	Positive	Negative	Positive	ER+/HER2+	1.61808
965	A5S0	965	TCGA-OL-A5S0	1161	66	Stage IIB	Positive	Negative	Negative	ER+/HER2-	4.03938
966	A5UO	966	TCGA-E9-A5UO	1054	41	Stage IIA	Positive	[Not Evaluated]	[Not Evaluated]	Unclassified	2.74119
967	A5UP	967	TCGA-E9-A5UP	1055	63	Stage IIA	Positive	[Not Evaluated]	Positive	ER+/HER2+	3.3493
968	A5XS	968	TCGA-AC-A5XS	288	74	Stage IIA	Positive	Positive	Negative	ER+/HER2-	4.58922
969	A5YL	969	TCGA-LL-A5YL	1133	64	Stage IIB	Positive	Negative	Positive	ER+/HER2+	3.82678
970	A5YM	970	TCGA-LL-A5YM	1134	88	Stage IIIB	Positive	Positive	Negative	ER+/HER2-	1.95149
971	A5YN	971	TCGA-LL-A5YN	1135	46	Stage IIA	Positive	Positive	Negative	ER+/HER2-	5.43973
972	A5YO	972	TCGA-LL-A5YO	1136	50	Stage IA	Negative	Negative	Negative	ER-/HER2-	6.39641
973	A5YP	973	TCGA-LL-A5YP	1137	49	Stage IIB	Positive	Negative	Negative	ER+/HER2-	3.84139
974	A5ZV	974	TCGA-A7-A5ZV	168	62	Stage IIA	Negative	Negative	Negative	ER-/HER2-	1.94904
975	A5ZW	975	TCGA-A7-A5ZW	169	47	Stage IIA	Positive	Positive	Negative	ER+/HER2-	3.4024
976	A5ZX	976	TCGA-A7-A5ZX	170	48	Stage IIIC	Positive	Positive	Negative	ER+/HER2-	2.45519
977	A62V	977	TCGA-AC-A62V	289	58	Stage IV	Positive	Positive	Negative	ER+/HER2-	1.09555
978	A62X	978	TCGA-AC-A62X	290	72	Stage IIA	Positive	Negative	Negative	ER+/HER2-	2.46037
979	A62Y	979	TCGA-AC-A62Y	291	79	Stage IIB	Positive	Positive	Negative	ER+/HER2-	3.08695
980	A66H	980	TCGA-OL-A66H	1162	74	Stage IB	Positive	Positive	Negative	ER+/HER2-	3.79659
981	A66I	981	TCGA-OL-A66I	1163	36	Stage IIA	Negative	Negative	Negative	ER-/HER2-	6.5549
982	A66J	982	TCGA-OL-A66J	1164	80	Stage I	Positive	Positive	[Not Evaluated]	Unclassified	3.2819
983	A66K	983	TCGA-OL-A66K	1165	72	Stage IIA	Positive	Positive	Equivocal	Unclassified	2.12306
984	A66L	984	TCGA-OL-A66L	1166	71	Stage IA	Positive	Positive	Negative	ER+/HER2-	3.5125
985	A66N	985	TCGA-OL-A66N	1167	59	Stage IIIC	Positive	Negative	Negative	ER+/HER2-	3.90376
986	A66O	986	TCGA-OL-A66O	1168	39	Stage IIB	Positive	Positive	Negative	ER+/HER2-	1.18277
987	A66P	987	TCGA-OL-A66P	1169	75	Stage IIA	Negative	Negative	Negative	ER-/HER2-	5.57898
988	A66U	988	TCGA-LD-A66U	1124	44	Stage IIB	Positive	Positive	Negative	ER+/HER2-	4.00515
989	A6FP	989	TCGA-LL-A6FP	1138	90	Stage IIA	Positive	Positive	Negative	ER+/HER2-	0.0716663
990	A6FQ	990	TCGA-LL-A6FQ	1139	77	Stage IIIA	Positive	Positive	Negative	ER+/HER2-	1.87775
991	A6FR	991	TCGA-LL-A6FR	1140	50	Stage IIA	Negative	Positive	Negative	ER-/HER2-	0.396702
992	A6HE	992	TCGA-E9-A6HE	1056	45	Stage IIIC	Positive	Positive	Negative	ER+/HER2-	3.96989
993	A6IV	993	TCGA-AC-A6IV	292	47	Stage IIB	Positive	Positive	Negative	ER+/HER2-	4.4042
994	A6IW	994	TCGA-AC-A6IW	293	73	Stage IIA	Negative	Negative	Negative	ER-/HER2-	5.39305
995	A6IX	995	TCGA-AC-A6IX	295	49	Stage IIIC	Positive	Positive	Negative	ER+/HER2-	3.63642
996	A6NO	996	TCGA-AC-A6NO	296	43	Stage IIB	Positive	Positive	Negative	ER+/HER2-	3.9785
997	A6R8	997	TCGA-BH-A6R8	744	46	Stage IIA	Positive	Positive	Negative	ER+/HER2-	4.44606
998	A6R9	998	TCGA-BH-A6R9	745	61	Stage IIA	Negative	Positive	Negative	ER-/HER2-	5.18698
999	A6VO	999	TCGA-OL-A6VO	1170	43	Stage IA	Negative	Negative	Negative	ER-/HER2-	3.90743
1000	A6VQ	1000	TCGA-OL-A6VQ	1171	49	Stage IIA	Positive	Positive	Negative	ER+/HER2-	4.00135
1001	A6VR	1001	TCGA-OL-A6VR	1172	48	Stage IA	Positive	Positive	Negative	ER+/HER2-	3.57491
1002	A6VV	1002	TCGA-A7-A6VV	171	51	Stage IIA	Negative	Negative	Negative	ER-/HER2-	3.74011
1003	A6VW	1003	TCGA-A7-A6VW	172	48	Stage IIA	Negative	Negative	Negative	ER-/HER2-	3.52291
1004	A6VX	1004	TCGA-A7-A6VX	173	68	Stage IIA	Positive	Positive	Negative	ER+/HER2-	2.98158
1005	A6VY	1005	TCGA-A7-A6VY	174	48	Stage IIB	Negative	Negative	Negative	ER-/HER2-	5.46464
1006	A6ZF	1006	TCGA-S3-A6ZF	1181	64	Stage IIA	Positive	Positive	Negative	ER+/HER2-	4.57343
1007	A6ZG	1007	TCGA-S3-A6ZG	1182	71	Stage IIB	Positive	Positive	Negative	ER+/HER2-	3.43998
1008	A6ZH	1008	TCGA-S3-A6ZH	1183	29	Stage IIIC	Positive	Positive	Equivocal	Unclassified	3.24223
1009	A73U	1009	TCGA-D8-A73U	873	88	Stage IIA	Positive	Positive	Negative	ER+/HER2-	5.74282
1010	A73W	1010	TCGA-D8-A73W	874	79	Stage IIIA	Positive	Negative	Negative	ER+/HER2-	3.35039
1011	A73X	1011	TCGA-D8-A73X	875	53	Stage IIA	Positive	Positive	Negative	ER+/HER2-	2.96866
1012	A73Y	1012	TCGA-LL-A73Y	1141	67	Stage IA	Negative	Negative	Negative	ER-/HER2-	4.40554
1013	A73Z	1013	TCGA-LL-A73Z	1142	55	Stage IV	Positive	Positive	Negative	ER+/HER2-	4.40389
1014	A740	1014	TCGA-LL-A740	1143	61	Stage IA	Negative	Negative	Equivocal	Unclassified	3.16936
1015	A74U	1015	TCGA-LD-A74U	1125	79	Stage IIIC	Positive	Negative	Negative	ER+/HER2-	3.7198
1016	A7SZ	1016	TCGA-LL-A7SZ	1144	49	Stage IIB	Positive	Positive	Negative	ER+/HER2-	5.35032
1017	A7T0	1017	TCGA-LL-A7T0	1145	70	Stage IIB	Positive	Positive	Positive	ER+/HER2+	3.57742
1018	A7U7	1018	TCGA-AQ-A7U7	397	55	Stage IIIA	Positive	Positive	Negative	ER+/HER2-	6.10539
1019	A7VB	1019	TCGA-AC-A7VB	297	51	Stage IIA	Positive	Negative	Positive	ER+/HER2+	1.43654
1020	A7VC	1020	TCGA-AC-A7VC	298	56	Stage IIB	Negative	Negative	Negative	ER-/HER2-	3.38686
1021	A7W5	1021	TCGA-LD-A7W5	1126	52	Stage IIIC	Positive	Positive	Negative	ER+/HER2-	5.75306
1022	A7W6	1022	TCGA-LD-A7W6	1127	54	Stage IIB	Positive	Positive	Negative	ER+/HER2-	3.54877
1023	A86G	1023	TCGA-W8-A86G	1193	66	Stage IIA	Positive	Positive	Negative	ER+/HER2-	1.90104
1024	A899	1024	TCGA-XX-A899	1196	46	Stage IIIA	Positive	Positive	Negative	ER+/HER2-	5.82567
1025	A89A	1025	TCGA-XX-A89A	1197	68	Stage IIB	Positive	Positive	Negative	ER+/HER2-	4.3692
1026	A8F5	1026	TCGA-LL-A8F5	1146	61	Stage IIA	Positive	Negative	Negative	ER+/HER2-	4.26643
1027	A8FY	1027	TCGA-BH-A8FY	746	87	Stage IA	Positive	Positive	Negative	ER+/HER2-	2.1032
1028	A8FZ	1028	TCGA-BH-A8FZ	747	58	Stage IA	Positive	Positive	Equivocal	Unclassified	5.12877
1029	A8G0	1029	TCGA-BH-A8G0	748	54	Stage IIB	Positive	Positive	Negative	ER+/HER2-	5.01929
1030	A8HP	1030	TCGA-C8-A8HP	795	59	Stage IIIA	Negative	Negative	Positive	ER-/HER2+	5.07217
1031	A8HQ	1031	TCGA-C8-A8HQ	796	53	Stage IIB	Positive	Positive	Negative	ER+/HER2-	4.5903
1032	A8HR	1032	TCGA-C8-A8HR	797	49	Stage IIIA	Positive	[Not Evaluated]	Negative	ER+/HER2-	4.74605
1033	A8LV	1033	TCGA-PL-A8LV	1177	54	Stage IIIB	Negative	[Not Evaluated]	Negative	ER-/HER2-	4.47043
1034	A8LX	1034	TCGA-PL-A8LX	1178	35	Stage IV	Positive	[Not Evaluated]	Negative	ER+/HER2-	1.81936
1035	A8LY	1035	TCGA-PL-A8LY	1179	30	Stage IIB	Positive	[Not Evaluated]	Negative	ER+/HER2-	2.66398
1036	A8LZ	1036	TCGA-PL-A8LZ	1180	29	Stage IIIB	Negative	[Not Evaluated]	Negative	ER-/HER2-	6.47919
1037	A8OP	1037	TCGA-AC-A8OP	299	72	Stage IA	Positive	Positive	Indeterminate	Unclassified	3.80483
1038	A8OQ	1038	TCGA-AC-A8OQ	300	72	Stage IIB	Negative	Negative	Negative	ER-/HER2-	4.86374
1039	A8OR	1039	TCGA-AC-A8OR	301	75	Stage IA	Positive	Positive	Negative	ER+/HER2-	1.89587
1040	A8OS	1040	TCGA-AC-A8OS	302	71	Stage IIA	Positive	Positive	Positive	ER+/HER2+	4.01576
1041	A8R5	1041	TCGA-Z7-A8R5	1198	61	Stage IIIA	Positive	Positive	Negative	ER+/HER2-	4.16015
1042	A8R6	1042	TCGA-Z7-A8R6	1199	46	Stage I	Positive	Positive	Negative	ER+/HER2-	2.8064
1043	A93S	1043	TCGA-UU-A93S	1192	63	Stage IV	Negative	Negative	Positive	ER-/HER2+	3.69796
1044	A97C	1044	TCGA-OL-A97C	1173	67	Stage IIB	Negative	Negative	Negative	ER-/HER2-	5.02119
1045	A9Q3	1045	TCGA-LL-A9Q3	1147	69	Stage IIIC	Positive	Positive	Positive	ER+/HER2+	2.71494
1046	A9QA	1046	TCGA-5T-A9QA	8	52	Stage IIA	Positive	Negative	Equivocal	Unclassified	1.5092
1047	A9QF	1047	TCGA-LD-A9QF	1128	73	Stage IA	Negative	Negative	Positive	ER-/HER2+	5.68733
1048	A9RU	1048	TCGA-E2-A9RU	979	90	Stage IIIC	Positive	Negative	Negative	ER+/HER2-	1.75633
1049	AA0Z	1049	TCGA-S3-AA0Z	1184	63	Stage IIB	Positive	Positive	Negative	ER+/HER2-	5.2834
1050	AA10	1050	TCGA-S3-AA10	1185	65	Stage IIA	Negative	Negative	Negative	ER-/HER2-	6.41753
1051	AA11	1051	TCGA-S3-AA11	1186	67	Stage IIA	Positive	Positive	Negative	ER+/HER2-	1.78572
1052	AA12	1052	TCGA-S3-AA12	1187	82	Stage IIIA	Positive	Negative	Negative	ER+/HER2-	1.74065
1053	AA14	1053	TCGA-S3-AA14	1188	47	Stage I	Positive	Positive	Positive	ER+/HER2+	3.05616
1054	AA15	1054	TCGA-S3-AA15	1189	51	Stage IIB	Negative	Negative	Negative	ER-/HER2-	6.09077
1055	AA17	1055	TCGA-S3-AA17	1190	64	Stage IIB	Positive	Positive	Negative	ER+/HER2-	6.42871
1056	AAAK	1056	TCGA-4H-AAAK	5	50	Stage IIIA	Positive	Positive	Equivocal	Unclassified	3.13326
1057	AAAU	1057	TCGA-3C-AAAU	1	55	Stage X	Positive	Positive	Negative	ER+/HER2-	1.56088
1058	AALI	1058	TCGA-3C-AALI	2	50	Stage IIB	Positive	Positive	Positive	ER+/HER2+	4.87813
1059	AALJ	1059	TCGA-3C-AALJ	3	62	Stage IIB	Positive	Positive	Negative	ER+/HER2-	4.51373
1060	AALK	1060	TCGA-3C-AALK	4	52	Stage IA	Positive	Positive	Positive	ER+/HER2+	3.30075
1061	AAT0	1061	TCGA-5L-AAT0	6	42	Stage IIA	Positive	Positive	Negative	ER+/HER2-	4.50928
1062	AAT1	1062	TCGA-5L-AAT1	7	63	Stage IV	Positive	Positive	Equivocal	Unclassified	5.33905
1063	AAZ6	1063	TCGA-UL-AAZ6	1191	73	Stage IIA	Positive	Positive	Positive	ER+/HER2+	2.16182
1064	AB28	1064	TCGA-BH-AB28	749	53	Stage IIIA	Positive	Positive	Negative	ER+/HER2-	4.33152
1065	AB41	1065	TCGA-WT-AB41	1194	55	Stage IIB	Positive	Positive	Negative	ER+/HER2-	4.85264
1066	AB44	1066	TCGA-WT-AB44	1195	77	Stage IA	Positive	Positive	Negative	ER+/HER2-	2.42667
