# Supplementary material for: Immune Gene Expression Is Associated with Genomic Aberrations in Breast Cancer
Source: Oxford University Press journal article supplement (doi:10.1158/0008-5472.can-16-3478), 2017-04-20
Supplement: 00085472can163478-sup-176412_2_unknown_upload_3970258_ss3ztm.xlsx [file 00085472can163478-sup-176412_2_unknown_upload_3970258_ss3ztm.xlsx]

## Sheet: Sheet1
References	Callari	Rody	Rooney	Rooney	Rooney	NeoSphere (Bianchini)	Rooney		NeoSphere (Bianchini)	NeoSphere (Bianchini)		Rooney	Rooney
								NeoSphere (Bianchini)
Immune-system component	T cell signatures				Activated	Antigen	NK cells	Macrophages	Antigen	Interferon-related genes		T-cell regulation
					CD8/NK cells	presenting cells			Presentation
Name of the signature	ImmuneScore	LCK	Tfh	Tregs	Cytolytic	MHC2	NK	Macrophages	MHC1	STAT1	IF_I	Co_stimulation		Co_inhibition
	PRF1	ARHGAP15	CD200	FOXP3	GZMA	HLA-DMA	KLRF1	FUCA1	HLA-A	CXCL10	DDX58	CD2		BTLA
	GZMB	ARHGAP25	CXCL13	C15orf53	PRF1	HLA-DQB1	KLRC1	MMP9	HLA-B	CXCL11	HERC6	CD226		C10orf54
	CXCL13	CCL5	FBLN7	IL5		HLA-DRA		LGMN	HLA-C	GBP1	IFI44	CD27		CD160
	IRF1	CCR2	ICOS	CTLA4		HLA-DRB4		HS3ST2	HLA-F	STAT1	IFI44L	CD28		CD244
	IKZF1	CCR7	SGPP2	IL32				TM4SF19	HLA-G		IFIT1	CD40		CD274
	HLA-E	CD2	SH2D1A	GPR15				CLEC5A	HLA-J		IFIT2	CD40LG		CTLA4
		CD247	TIGIT	IL4				GPNMB			MX1	CD58		HAVCR2
		CD27	PDCD1					C11orf45			OAS1	CD70		LAG3
		CD3D						CD68			OAS3	ICOS		LAIR1
		CD48						CYBB			RSAD2	ICOSLG		LGALS9
		CD53										SLAMF1		PDCD1LG2
		CORO1A										TNFRSF18		PVRL3
		CSF2RB										TNFRSF25		TIGIT
		EVI2B										TNFRSF4
		FGL2										TNFRSF8
		GIMAP4										TNFRSF9
		GIMAP5										TNFSF14
		GMFG										TNFSF15
		GZMA										TNFSF18
		GZMK										TNFSF4
		HCLS1										TNFSF8
		IL10RA										TNFSF9
		IL2RG
		IL7R
		INPP5D
		IRF8
		ITK
		KLRK1
		LCK
		LCP2
		LPXN
		LTB
		PIK3CD
		PLAC8
		PRG1
		PRKCB1
		PTPRC
		RAC2
		SAMSSN1
		SCYA5
		SELL
		SD2D1A
		SLA
		SLAMF1
		STAT4
		TNFRSF7
		TRBC1
